# Supplementary material for: The relationship between Social Determinants of Health (SDoH) and death from cardiovascular disease or opioid use in counties across the United States (2009–2018)
Source: PubMed Central journal article supplement (PMC8817535; doi:10.1186/s12889-022-12653-8), 2022-02-04
Supplement: 12889_2022_12653_MOESM2_ESM.pdf [file 12889_2022_12653_MOESM2_ESM.pdf]

# APPENDIX 2

## STATISTICAL SUPPLEMENT

It would be relevant to note that our preferred fixed effects models indicated moderate to high correlation between fixed effects (or unobserved heterogeneity) and our independent variables, implying that our models did well by controlling for these fixed effects. The fixed effects models that included county and year fixed-effects only (i.e., 'Specification 1' for both CVD and opioid use death rates), were each generated using two approaches, 1) the 'fixed effects estimator' approach and 2) the 'least square dummy variables' approach, to ensure that the estimates (regression coefficient values) generated by both approaches, matched each other. The results revealed an exact match in coefficient values from both approaches for both CVD and opioid use death rates. Additionally, the model R-square in the 'least squares dummy variables' models were 0.8776 for CVD mortality and 0.8392 for opioid use mortality, indicating that these models served to explain a large portion of the variance in CVD mortality and opioid use mortality, respectively.

### CONTENTS OF THIS SUPPLEMENTARY FILE

#### 1. STATA OUTPUT - OPIOID USE DEATH RATE

Page 2. COUNTY AND YEAR FIXED-EFFECTS FOR OPIOID USE DEATH RATE

- Table 4, Specification 1 (in manuscript)

Page 3. COUNTY, YEAR, and STATE-BY-YEAR FIXED-EFFECTS FOR OPIOID USE DEATH RATE

- Table 4, Specification 2 (in manuscript)

#### 2. STATA OUTPUT - CVD DEATH RATE

Page 10. COUNTY AND YEAR FIXED-EFFECTS FOR CVD DEATH RATE

- Table 2, Specification 1 (in manuscript)

Page 11. COUNTY, YEAR, and STATE-BY-YEAR FIXED-EFFECTS FOR CVD DEATH RATE

- Table 2, Specification 2 (in manuscript)

#### 3. TOTAL NUMBER OF MISSING OBSERVATIONS BY DEPENDENT VARIABLE

Page 19

#### 4. METHOD FOR CALCULATING IMPACT OF SIGNIFICANT PREDICTORS ON SAMPLE MEAN MORTALITY RATES (TABLES 3 AND TABLE 5)

Page 20

COUNTY AND YEAR FIXED EFFECTS FOR OPIOID USE DEATH RATE (TABLE 4, SPECIFICATION 1)

Fixed-effects (within) regression  
 Group variable: county\_fip-e  
 R-sq:  
 within = 0.3659  
 between = 0.1756  
 overall = 0.1476  
 Number of obs = 3,272  
 Number of groups = 554  
 Obs per group:  
 min = 1  
 avg = 5.9  
 max = 10  
 F(28,553) = 17.30  
 Prob > F = 0.0000  
 corr(u\_i, Xb) = -0.9434

(Std. Err. adjusted for 554 clusters in county\_fipscode)

| cdc_opioid_death     | Coef.     | Robust Std. Err.                  | t     | P> t  | [95% Conf. Interval] |
|----------------------|-----------|-----------------------------------|-------|-------|----------------------|
| acs_pct_female       | -2.97943  | 1.520326                          | -1.96 | 0.051 | -5.965751 .0068906   |
| acs_median_age       | -1.561816 | 1.06467                           | -1.47 | 0.143 | -3.653108 .5294754   |
| acs_pct_black        | -.0260737 | .6232132                          | -0.04 | 0.967 | -1.250228 1.198081   |
| acs_pct_white        | -.0427271 | .1831953                          | -0.23 | 0.816 | -.4025709 .3171167   |
| acs_pct_hispan       | -.8499315 | .547428                           | -1.55 | 0.121 | -1.925224 .2253611   |
| acs_pct_asian        | -.7129578 | .7763505                          | -0.92 | 0.359 | -2.237914 .8119988   |
| acs_pct_bachelor_dgr | .828501   | .7093535                          | 1.17  | 0.243 | -.5648559 2.221858   |
| acs_median_hh_income | -.0002196 | .0002075                          | -1.06 | 0.290 | -.0006272 .000188    |
| acs_pct_person_inc99 | .9581279  | .3668685                          | 2.61  | 0.009 | .2375016 1.678754    |
| acs_pct_unemploy     | .2896208  | .4403138                          | 0.66  | 0.511 | -.5752713 1.154513   |
| acs_pct_grp_qrt      | .2479495  | 1.175182                          | 0.21  | 0.833 | -2.060416 2.556315   |
| acs_pct_va           | -1.593724 | .8986767                          | -1.77 | 0.077 | -3.358962 .1715133   |
| acs_pct_armed_forces | 1.086618  | .6898298                          | 1.58  | 0.116 | -.2683886 2.441626   |
| ahrf_fed_hlth_cnt    | .0510922  | .0335136                          | 1.52  | 0.128 | -.0147372 .1169217   |
| ahrf_rural_h_clinic  | -.0076559 | .3444708                          | -0.02 | 0.982 | -.6842871 .6689752   |
| acs_total_household  | .0000531  | .0000475                          | 1.12  | 0.264 | -.0000401 .0001464   |
| acs_pct_rented_hh    | -.1175498 | .3768721                          | -0.31 | 0.755 | -.8578258 .6227261   |
| acs_pct_mobile_home  | 1.157881  | .5888022                          | 1.97  | 0.050 | .001319 2.314444     |
| acs_total_pop_wt     | -.0000605 | .0000127                          | -4.75 | 0.000 | -.0000855 -.0000355  |
| year                 |           |                                   |       |       |                      |
| 2010                 | -.603591  | 1.605359                          | -0.38 | 0.707 | -3.756938 2.549756   |
| 2011                 | 1.100544  | 1.486412                          | 0.74  | 0.459 | -1.819161 4.020249   |
| 2012                 | .9990104  | 1.915128                          | 0.52  | 0.602 | -2.762806 4.760826   |
| 2013                 | 1.441987  | 2.373825                          | 0.61  | 0.544 | -3.22083 6.104803    |
| 2014                 | 3.318097  | 2.868838                          | 1.16  | 0.248 | -2.317054 8.953249   |
| 2015                 | 6.083412  | 3.384051                          | 1.80  | 0.073 | -.5637549 12.73058   |
| 2016                 | 11.08971  | 3.977029                          | 2.79  | 0.005 | 3.277778 18.90164    |
| 2017                 | 14.55504  | 4.715348                          | 3.09  | 0.002 | 5.292857 23.81723    |
| 2018                 | 14.81599  | 5.323405                          | 2.78  | 0.006 | 4.359425 25.27256    |
| _cons                | 257.825   | 97.31878                          | 2.65  | 0.008 | 66.66534 448.9847    |
| sigma_u              | 33.304578 |                                   |       |       |                      |
| sigma_e              | 6.7348966 |                                   |       |       |                      |
| rho                  | .9607131  | (fraction of variance due to u_i) |       |       |                      |

COUNTY, YEAR, & STATE-BY-YEAR FIXED EFFECTS FOR OPIOID USE DEATH RATE (TABLE 4, SPECIFICATION 2)

Fixed-effects (within) regression  
 Group variable: county\_fip~e  
 Number of obs = 3,272  
 Number of groups = 554  
 R-sq: within = 0.6004  
 between = 0.2305  
 overall = 0.2090  
 Obs per group: min = 1  
 avg = 5.9  
 max = 10  
 corr(u\_i, Xb) = -0.7433  
 F(271,553) = 2175.00  
 Prob > F = 0.0000

(Std. Err. adjusted for 554 clusters in county\_fipscode)

| cdc_opioid_death     | Coef.     | Robust Std. Err. | t     | P> t  | [95% Conf. Interval] |           |
|----------------------|-----------|------------------|-------|-------|----------------------|-----------|
| acs_pct_female       | -.1038778 | 1.38789          | -0.07 | 0.940 | -2.830058            | 2.622302  |
| acs_median_age       | -1.818271 | .9173134         | -1.98 | 0.048 | -3.620116            | -.0164267 |
| acs_pct_black        | -.8427783 | .6334552         | -1.33 | 0.184 | -2.087051            | .4014943  |
| acs_pct_white        | .0736518  | .1366791         | 0.54  | 0.590 | -.1948218            | .3421255  |
| acs_pct_hispan       | -.7622937 | .4591811         | -1.66 | 0.097 | -1.664246            | .1396588  |
| acs_pct_asian        | -.3583486 | .700493          | -0.51 | 0.609 | -1.734301            | 1.017604  |
| acs_pct_bachelor_dgr | -.0352932 | .6007481         | -0.06 | 0.953 | -1.215321            | 1.144734  |
| acs_median_hh_income | -.0002722 | .0001616         | -1.69 | 0.093 | -.0005896            | .0000451  |
| acs_pct_person_inc99 | .3505055  | .3763996         | 0.93  | 0.352 | -.3888424            | 1.089853  |
| acs_pct_unemploy     | -1.001564 | .6353915         | -1.58 | 0.116 | -2.24964             | .2465124  |
| acs_pct_grp_qrt      | .3511598  | .9632748         | 0.36  | 0.716 | -1.540965            | 2.243285  |
| acs_pct_va           | -1.352879 | .8021658         | -1.69 | 0.092 | -2.928544            | .2227854  |
| acs_pct_armed_forces | -.6789627 | .4940171         | -1.37 | 0.170 | -1.649342            | .2914168  |
| ahrf_fed_hlth_cnt    | .0419603  | .0328061         | 1.28  | 0.201 | -.0224796            | .1064001  |
| ahrf_rural_h_clinic  | .3126213  | .226519          | 1.38  | 0.168 | -.1323216            | .7575642  |
| acs_total_household  | .0000125  | .0000367         | 0.34  | 0.733 | -.0000596            | .0000846  |
| acs_pct_rented_hh    | -.2319311 | .3980847         | -0.58 | 0.560 | -1.013874            | .550012   |
| acs_pct_mobile_home  | .9330352  | .6705346         | 1.39  | 0.165 | -.3840712            | 2.250141  |
| acs_total_pop_wt     | -9.70e-06 | .000011          | -0.88 | 0.377 | -.0000312            | .0000118  |
| year                 |           |                  |       |       |                      |           |
| 2010                 | 5.816762  | 2.386956         | 2.44  | 0.015 | 1.128153             | 10.50537  |
| 2011                 | 4.764055  | 2.174633         | 2.19  | 0.029 | .4925033             | 9.035606  |
| 2012                 | 5.686462  | 2.470515         | 2.30  | 0.022 | .8337208             | 10.5392   |
| 2013                 | 8.585415  | 2.850783         | 3.01  | 0.003 | 2.985728             | 14.1851   |
| 2014                 | 9.82001   | 3.363072         | 2.92  | 0.004 | 3.214051             | 16.42597  |
| 2015                 | 7.878705  | 3.585629         | 2.20  | 0.028 | .8355862             | 14.92182  |
| 2016                 | 12.17845  | 4.022629         | 3.03  | 0.003 | 4.276944             | 20.07995  |
| 2017                 | 15.72429  | 4.360762         | 3.61  | 0.000 | 7.158604             | 24.28997  |
| 2018                 | 12.78837  | 5.006174         | 2.55  | 0.011 | 2.954926             | 22.62181  |
| state_year_num       |           |                  |       |       |                      |           |
| Alabama2010          | -6.646825 | 2.435963         | -2.73 | 0.007 | -11.4317             | -1.861953 |
| Alabama2011          | -8.900078 | 2.893243         | -3.08 | 0.002 | -14.58317            | -3.216988 |
| Alabama2012          | -7.889398 | 2.527957         | -3.12 | 0.002 | -12.85497            | -2.923826 |
| Alabama2013          | -5.45175  | 1.804021         | -3.02 | 0.003 | -8.995323            | -1.908177 |
| Alabama2014          | 1.781881  | 2.785022         | 0.64  | 0.523 | -3.688634            | 7.252397  |
| Alabama2015          | 1.672318  | 3.702419         | 0.45  | 0.652 | -5.600206            | 8.944842  |
| Alabama2016          | -1.609039 | 5.311465         | -0.30 | 0.762 | -12.04215            | 8.824075  |
| Alabama2017          | -3.79635  | 4.448594         | -0.85 | 0.394 | -12.53456            | 4.941858  |
| Alabama2018          | -2.212069 | 4.182585         | -0.53 | 0.597 | -10.42777            | 6.003628  |
| Alaska2009           | 14.56081  | 3.979109         | 3.66  | 0.000 | 6.744795             | 22.37683  |
| Alaska2010           | 8.192934  | 4.190749         | 1.96  | 0.051 | -.0387986            | 16.42467  |
| Alaska2011           | 8.871232  | 3.252741         | 2.73  | 0.007 | 2.481993             | 15.26047  |
| Alaska2012           | 8.346118  | 2.950923         | 2.83  | 0.005 | 2.549729             | 14.14251  |
| Alaska2013           | 5.825659  | 2.777884         | 2.10  | 0.036 | .3691634             | 11.28216  |
| Alaska2014           | 4.459551  | 3.081679         | 1.45  | 0.148 | -1.593677            | 10.51278  |
| Alaska2015           | 6.002479  | 2.552617         | 2.35  | 0.019 | .9884671             | 11.01649  |
| Alaska2016           | 3.555525  | 1.360745         | 2.61  | 0.009 | .8826635             | 6.228386  |
| Alaska2017           | 4.825554  | 2.142893         | 2.25  | 0.025 | .6163479             | 9.03476   |
| Alaska2018           | 0         | (omitted)        |       |       |                      |           |
| Arizona2009          | 5.313043  | 4.4236           | 1.20  | 0.230 | -3.37607             | 14.00216  |
| Arizona2010          | 4.167429  | 5.404506         | 0.77  | 0.441 | -6.448443            | 14.7833   |

|                       |           |           |       |       |           |           |
|-----------------------|-----------|-----------|-------|-------|-----------|-----------|
| Arizona2011           | 3.47981   | 4.736037  | 0.73  | 0.463 | -5.823013 | 12.78263  |
| Arizona2012           | 3.085829  | 4.60559   | 0.67  | 0.503 | -5.960762 | 12.13242  |
| Arizona2013           | .8983563  | 4.402184  | 0.20  | 0.838 | -7.748692 | 9.545404  |
| Arizona2014           | -.776917  | 4.13928   | -0.19 | 0.851 | -8.907552 | 7.353718  |
| Arizona2015           | 3.613812  | 4.464939  | 0.81  | 0.419 | -5.156503 | 12.38413  |
| Arizona2016           | -1.156542 | 2.448467  | -0.47 | 0.637 | -5.965976 | 3.652892  |
| Arizona2017           | -4.592151 | 2.53194   | -1.81 | 0.070 | -9.565547 | .3812442  |
| Arizona2018           | 0         | (omitted) |       |       |           |           |
| Arkansas2009          | 3.954104  | 3.158678  | 1.25  | 0.211 | -2.25037  | 10.15858  |
| Arkansas2010          | 5.596005  | 3.512223  | 1.59  | 0.112 | -1.302925 | 12.49493  |
| Arkansas2011          | 2.280555  | 3.351184  | 0.68  | 0.496 | -4.302051 | 8.863162  |
| Arkansas2012          | .3150828  | 3.272783  | 0.10  | 0.923 | -6.113525 | 6.74369   |
| Arkansas2013          | -.0074553 | 3.02345   | -0.00 | 0.998 | -5.946306 | 5.931395  |
| Arkansas2014          | -1.035484 | 3.605304  | -0.29 | 0.774 | -8.11725  | 6.046283  |
| Arkansas2015          | -.4801002 | 3.579416  | -0.13 | 0.893 | -7.511015 | 6.550814  |
| Arkansas2016          | -4.340978 | 2.969062  | -1.46 | 0.144 | -10.173   | 1.491042  |
| Arkansas2017          | -6.749472 | 2.73499   | -2.47 | 0.014 | -12.12171 | -1.377231 |
| Arkansas2018          | 0         | (omitted) |       |       |           |           |
| California2009        | 6.829243  | 2.826822  | 2.42  | 0.016 | 1.276622  | 12.38186  |
| California2010        | 5.414934  | 3.173386  | 1.71  | 0.089 | -.8184297 | 11.6483   |
| California2011        | 4.730443  | 2.870286  | 1.65  | 0.100 | -.907554  | 10.36844  |
| California2012        | 3.440495  | 2.742468  | 1.25  | 0.210 | -1.946434 | 8.827424  |
| California2013        | 1.288867  | 2.499434  | 0.52  | 0.606 | -3.620679 | 6.198412  |
| California2014        | 1.006741  | 2.917278  | 0.35  | 0.730 | -4.723559 | 6.773042  |
| California2015        | 2.214998  | 2.420271  | 0.92  | 0.360 | -2.539051 | 6.969048  |
| California2016        | -2.094621 | 1.098709  | -1.91 | 0.057 | -4.252775 | .0635326  |
| California2017        | -4.702649 | 2.025192  | -2.32 | 0.021 | -8.680659 | -.7246395 |
| California2018        | 0         | (omitted) |       |       |           |           |
| Colorado2009          | 7.45438   | 3.714101  | 2.01  | 0.045 | .1589084  | 14.74985  |
| Colorado2010          | 3.055567  | 3.591661  | 0.85  | 0.395 | -3.9994   | 10.11053  |
| Colorado2011          | 4.558344  | 3.295294  | 1.38  | 0.167 | -1.91448  | 11.03117  |
| Colorado2012          | 4.887616  | 2.898005  | 1.69  | 0.092 | -.8048285 | 10.58006  |
| Colorado2013          | 2.675532  | 2.954198  | 0.91  | 0.366 | -3.12729  | 8.478353  |
| Colorado2014          | 2.531451  | 2.951871  | 0.86  | 0.391 | -3.266799 | 8.329702  |
| Colorado2015          | 2.097725  | 2.57309   | 0.82  | 0.415 | -2.9565   | 7.151951  |
| Colorado2016          | -1.546532 | .9446696  | -1.64 | 0.102 | -3.402111 | .3090478  |
| Colorado2017          | -3.934285 | 2.146209  | -1.83 | 0.067 | -8.150004 | .2814335  |
| Colorado2018          | 0         | (omitted) |       |       |           |           |
| Connecticut2009       | -15.06519 | 3.722312  | -4.05 | 0.000 | -22.37679 | -7.753586 |
| Connecticut2010       | -16.18508 | 3.965099  | -4.08 | 0.000 | -23.97357 | -8.396578 |
| Connecticut2011       | -16.89791 | 3.88954   | -4.34 | 0.000 | -24.53799 | -9.257832 |
| Connecticut2012       | -16.35691 | 3.540344  | -4.62 | 0.000 | -23.31107 | -9.402739 |
| Connecticut2013       | -13.00978 | 3.853014  | -3.38 | 0.001 | -20.57811 | -5.441445 |
| Connecticut2014       | -10.60894 | 3.51173   | -3.02 | 0.003 | -17.5069  | -3.710981 |
| Connecticut2015       | -7.954282 | 3.56702   | -2.23 | 0.026 | -14.96085 | -.9477172 |
| Connecticut2016       | -5.982237 | 3.170503  | -1.89 | 0.060 | -12.20994 | .2454656  |
| Connecticut2017       | -4.164874 | 3.253725  | -1.28 | 0.201 | -10.55605 | 2.226298  |
| Connecticut2018       | 0         | (omitted) |       |       |           |           |
| Delaware2009          | -24.27757 | 3.717463  | -6.53 | 0.000 | -31.57964 | -16.97549 |
| Delaware2010          | -23.14182 | 3.983893  | -5.81 | 0.000 | -30.96724 | -15.31641 |
| Delaware2011          | -21.08409 | 4.403089  | -4.79 | 0.000 | -29.73291 | -12.43526 |
| Delaware2012          | -21.56666 | 5.217795  | -4.13 | 0.000 | -31.81579 | -11.31754 |
| Delaware2013          | -22.2573  | 5.009942  | -4.44 | 0.000 | -32.09815 | -12.41646 |
| Delaware2014          | -21.44856 | 6.22195   | -3.45 | 0.001 | -33.6701  | -9.227011 |
| Delaware2015          | -19.59698 | 4.33149   | -4.52 | 0.000 | -28.10516 | -11.08879 |
| Delaware2016          | -25.80849 | 4.758109  | -5.42 | 0.000 | -35.15467 | -16.46232 |
| Delaware2017          | -17.36592 | 2.226038  | -7.80 | 0.000 | -21.73845 | -12.9934  |
| Delaware2018          | 0         | (omitted) |       |       |           |           |
| Dist. of Columbia2010 | -10.71787 | 5.106113  | -2.10 | 0.036 | -20.74762 | -.6881237 |
| Dist. of Columbia2011 | -10.79532 | 4.395932  | -2.46 | 0.014 | -19.43009 | -2.160555 |
| Dist. of Columbia2012 | -12.75646 | 3.919897  | -3.25 | 0.001 | -20.45617 | -5.056753 |
| Dist. of Columbia2013 | -14.46331 | 3.2016    | -4.52 | 0.000 | -20.75209 | -8.174522 |
| Dist. of Columbia2014 | -14.78457 | 3.317263  | -4.46 | 0.000 | -21.30055 | -8.268596 |
| Dist. of Columbia2015 | -8.395736 | 2.694578  | -3.12 | 0.002 | -13.6886  | -3.102876 |
| Dist. of Columbia2016 | 2.668813  | 1.317039  | 2.03  | 0.043 | .0818014  | 5.255824  |
| Dist. of Columbia2017 | 4.549055  | 2.013657  | 2.26  | 0.024 | .5937028  | 8.504408  |
| Dist. of Columbia2018 | 0         | (omitted) |       |       |           |           |
| Florida2009           | -2.528809 | 3.421146  | -0.74 | 0.460 | -9.248839 | 4.191221  |
| Florida2010           | -.7846643 | 3.698923  | -0.21 | 0.832 | -8.050322 | 6.480993  |
| Florida2011           | -3.032281 | 3.391231  | -0.89 | 0.372 | -9.693551 | 3.628988  |
| Florida2012           | -6.016637 | 3.213631  | -1.87 | 0.062 | -12.32905 | .2957795  |
| Florida2013           | -8.480415 | 2.850152  | -2.98 | 0.003 | -14.07886 | -2.881967 |
| Florida2014           | -.78471   | 3.275938  | -2.40 | 0.017 | -14.2819  | -1.412295 |
| Florida2015           | -2.161008 | 3.074491  | -0.70 | 0.482 | -8.200118 | 3.878101  |
| Florida2016           | -3.140567 | 2.395265  | -1.31 | 0.190 | -7.845497 | 1.564362  |
| Florida2017           | -5.932715 | 2.563947  | -2.31 | 0.021 | -10.96898 | -.8964489 |

|              |           |           |       |       |           |           |  |
|--------------|-----------|-----------|-------|-------|-----------|-----------|--|
| Florida2018  | 0         | (omitted) |       |       |           |           |  |
| Georgia2009  | -2.149265 | 4.567887  | -0.47 | 0.638 | -11.1218  | 6.823267  |  |
| Georgia2010  | .1697815  | 3.40599   | 0.05  | 0.960 | -6.520479 | 6.860042  |  |
| Georgia2011  | .7121356  | 3.325918  | 0.21  | 0.831 | -5.820842 | 7.245113  |  |
| Georgia2012  | .4357548  | 3.12849   | 0.14  | 0.889 | -5.709423 | 6.580932  |  |
| Georgia2013  | -.9693001 | 2.586314  | -0.37 | 0.708 | -6.0495   | 4.1109    |  |
| Georgia2014  | -1.796175 | 3.258633  | -0.55 | 0.582 | -8.196987 | 4.604637  |  |
| Georgia2015  | 2.346649  | 2.604675  | 0.90  | 0.368 | -2.769617 | 7.462915  |  |
| Georgia2016  | -2.090992 | 1.374402  | -1.52 | 0.129 | -4.790679 | .608696   |  |
| Georgia2017  | -5.786419 | 2.339683  | -2.47 | 0.014 | -10.38217 | -1.190666 |  |
| Georgia2018  | 0         | (omitted) |       |       |           |           |  |
| Hawaii2009   | 11.83703  | 3.717101  | 3.18  | 0.002 | 4.53566   | 19.13839  |  |
| Hawaii2010   | 12.19558  | 4.115502  | 2.96  | 0.003 | 4.111652  | 20.27951  |  |
| Hawaii2011   | 9.23636   | 3.408234  | 2.71  | 0.007 | 2.541692  | 15.93103  |  |
| Hawaii2012   | 7.79297   | 3.158657  | 2.47  | 0.014 | 1.588538  | 13.9974   |  |
| Hawaii2013   | 5.510083  | 2.718769  | 2.03  | 0.043 | .1697056  | 10.85046  |  |
| Hawaii2014   | 2.514484  | 3.023782  | 0.83  | 0.406 | -3.425019 | 8.453988  |  |
| Hawaii2015   | 5.019826  | 2.498331  | 2.01  | 0.045 | .1124478  | 9.927204  |  |
| Hawaii2016   | 1.755725  | 1.099261  | 1.60  | 0.111 | -.4035128 | 3.914963  |  |
| Hawaii2017   | -2.856451 | 1.991929  | -1.43 | 0.152 | -6.769124 | 1.056221  |  |
| Hawaii2018   | 0         | (omitted) |       |       |           |           |  |
| Idaho2009    | 7.395892  | 2.358986  | 3.14  | 0.002 | 2.762223  | 12.02956  |  |
| Idaho2010    | 3.71809   | 2.8156    | 1.32  | 0.187 | -1.812489 | 9.248669  |  |
| Idaho2011    | 3.009771  | 2.593214  | 1.16  | 0.246 | -2.083983 | 8.103524  |  |
| Idaho2013    | -.026366  | 2.286062  | -0.01 | 0.991 | -4.516792 | 4.46406   |  |
| Idaho2014    | -.5583259 | 2.773988  | -0.20 | 0.841 | -6.007167 | 4.890515  |  |
| Idaho2015    | -1.712617 | 2.355101  | -0.73 | 0.467 | -6.338655 | 2.913422  |  |
| Idaho2016    | -4.663594 | .836064   | -5.58 | 0.000 | -6.305843 | -3.021344 |  |
| Idaho2017    | -7.428335 | 1.930937  | -3.85 | 0.000 | -11.2212  | -3.635466 |  |
| Idaho2018    | 0         | (omitted) |       |       |           |           |  |
| Illinois2009 | -5.666955 | 3.784161  | -1.50 | 0.135 | -13.10004 | 1.766133  |  |
| Illinois2010 | -5.910597 | 4.25884   | -1.39 | 0.166 | -14.27608 | 2.454884  |  |
| Illinois2011 | -6.725834 | 4.115933  | -1.63 | 0.103 | -14.81061 | 1.358942  |  |
| Illinois2012 | -4.01237  | 3.448031  | -1.16 | 0.245 | -10.78521 | 2.760469  |  |
| Illinois2013 | -8.160763 | 2.904391  | -2.81 | 0.005 | -13.86575 | -2.455775 |  |
| Illinois2014 | -6.520922 | 3.253611  | -2.00 | 0.046 | -12.91187 | -.1299736 |  |
| Illinois2015 | -3.453535 | 2.905364  | -1.19 | 0.235 | -9.160433 | 2.253364  |  |
| Illinois2016 | -5.439685 | 1.736147  | -3.13 | 0.002 | -8.849933 | -2.029436 |  |
| Illinois2017 | -4.725758 | 2.49119   | -1.90 | 0.058 | -9.619111 | .1675936  |  |
| Illinois2018 | 0         | (omitted) |       |       |           |           |  |
| Indiana2009  | 5.986633  | 6.747616  | 0.89  | 0.375 | -7.26746  | 19.24073  |  |
| Indiana2010  | 5.000472  | 6.499953  | 0.77  | 0.442 | -7.767145 | 17.76809  |  |
| Indiana2011  | 7.253224  | 7.788073  | 0.93  | 0.352 | -8.044601 | 22.55105  |  |
| Indiana2012  | 2.560793  | 6.735932  | 0.38  | 0.704 | -10.67035 | 15.79194  |  |
| Indiana2013  | -.2817    | 5.78214   | -0.05 | 0.961 | -11.63934 | 11.07594  |  |
| Indiana2014  | -.1645594 | 6.468376  | -0.03 | 0.980 | -12.87015 | 12.54103  |  |
| Indiana2015  | .0629697  | 4.912814  | 0.01  | 0.990 | -9.58709  | 9.71303   |  |
| Indiana2016  | -.0372328 | 6.12305   | -0.01 | 0.995 | -12.06451 | 11.99005  |  |
| Indiana2017  | 4.710643  | 7.707984  | 0.61  | 0.541 | -10.42987 | 19.85115  |  |
| Indiana2018  | 0         | (omitted) |       |       |           |           |  |
| Iowa2009     | 8.298109  | 2.765663  | 3.00  | 0.003 | 2.86562   | 13.7306   |  |
| Iowa2010     | 2.971048  | 2.919698  | 1.02  | 0.309 | -2.764007 | 8.706102  |  |
| Iowa2011     | 7.12847   | 2.699102  | 2.64  | 0.008 | 1.826724  | 12.43022  |  |
| Iowa2012     | 3.706549  | 3.158406  | 1.17  | 0.241 | -2.497392 | 9.910489  |  |
| Iowa2013     | 4.337173  | 3.312837  | 1.31  | 0.191 | -2.170111 | 10.84446  |  |
| Iowa2014     | .2999373  | 3.35924   | 0.09  | 0.929 | -6.298494 | 6.898369  |  |
| Iowa2015     | 2.793598  | 2.475406  | 1.13  | 0.260 | -2.06875  | 7.655946  |  |
| Iowa2016     | -1.247709 | .8846551  | -1.41 | 0.159 | -2.985405 | .4899858  |  |
| Iowa2017     | -3.031635 | 2.655484  | -1.14 | 0.254 | -8.247704 | 2.184434  |  |
| Iowa2018     | 0         | (omitted) |       |       |           |           |  |
| Kansas2009   | 7.834673  | 2.43361   | 3.22  | 0.001 | 3.054422  | 12.61492  |  |
| Kansas2010   | 3.112604  | 2.935621  | 1.06  | 0.289 | -2.653729 | 8.878937  |  |
| Kansas2011   | 4.921797  | 2.607526  | 1.89  | 0.060 | -.2000696 | 10.04366  |  |
| Kansas2012   | 5.247529  | 2.533245  | 2.07  | 0.039 | .271569   | 10.22349  |  |
| Kansas2013   | 2.475547  | 2.260265  | 1.10  | 0.274 | -1.964208 | 6.915302  |  |
| Kansas2014   | 1.433474  | 2.733958  | 0.52  | 0.600 | -3.936739 | 6.803686  |  |
| Kansas2015   | 1.819909  | 2.303625  | 0.79  | 0.430 | -2.705017 | 6.344835  |  |
| Kansas2016   | -.5441277 | .9312901  | -0.58 | 0.559 | -2.373426 | 1.285171  |  |
| Kansas2017   | -4.789659 | 2.009958  | -2.38 | 0.018 | -8.737745 | -.8415723 |  |
| Kansas2018   | 0         | (omitted) |       |       |           |           |  |
| Kentucky2009 | -18.88052 | 4.003388  | -4.72 | 0.000 | -26.74422 | -11.01681 |  |
| Kentucky2010 | -15.93357 | 4.018332  | -3.97 | 0.000 | -23.82663 | -8.040512 |  |
| Kentucky2011 | -17.3422  | 4.409517  | -3.93 | 0.000 | -26.00365 | -8.680746 |  |
| Kentucky2012 | -9.441922 | 4.402716  | -2.14 | 0.032 | -18.09001 | -.7938288 |  |
| Kentucky2013 | -16.21529 | 5.009575  | -3.24 | 0.001 | -26.05542 | -6.375171 |  |
| Kentucky2014 | -13.22562 | 3.890321  | -3.40 | 0.001 | -20.86724 | -5.58401  |  |

|                   |           |           |       |       |           |           |
|-------------------|-----------|-----------|-------|-------|-----------|-----------|
| Kentucky2015      | -5.286665 | 3.751622  | -1.41 | 0.159 | -12.65584 | 2.082508  |
| Kentucky2016      | -5.648077 | 3.066001  | -1.84 | 0.066 | -11.67051 | .3743556  |
| Kentucky2017      | .2381202  | 3.496352  | 0.07  | 0.946 | -6.629634 | 7.105875  |
| Kentucky2018      | 0         | (omitted) |       |       |           |           |
| Louisiana2009     | -8.11577  | 3.038043  | -2.67 | 0.008 | -14.08329 | -2.148255 |
| Louisiana2010     | -5.10155  | 3.654029  | -1.40 | 0.163 | -12.27902 | 2.075924  |
| Louisiana2011     | -7.612088 | 5.507517  | -1.38 | 0.167 | -18.4303  | 3.206125  |
| Louisiana2012     | -6.395085 | 3.255445  | -1.96 | 0.050 | -12.78964 | -.0005348 |
| Louisiana2013     | -1.128367 | 4.104418  | -0.27 | 0.783 | -9.190524 | 6.93379   |
| Louisiana2014     | -4.148021 | 4.07616   | -1.02 | 0.309 | -12.15467 | 3.85863   |
| Louisiana2015     | -2.747743 | 2.693013  | -1.02 | 0.308 | -8.037529 | 2.542044  |
| Louisiana2016     | -4.886611 | 2.427131  | -2.01 | 0.045 | -9.654134 | -.1190878 |
| Louisiana2017     | -4.333181 | 2.550959  | -1.70 | 0.090 | -9.343936 | .6775739  |
| Louisiana2018     | 0         | (omitted) |       |       |           |           |
| Maine2009         | -8.19772  | 3.520399  | -2.33 | 0.020 | -15.11271 | -1.282729 |
| Maine2012         | -6.603349 | 2.847622  | -2.32 | 0.021 | -12.19683 | -1.009871 |
| Maine2013         | -12.44045 | 4.16671   | -2.99 | 0.003 | -20.62497 | -4.255936 |
| Maine2014         | -7.380499 | 3.494529  | -2.11 | 0.035 | -14.24467 | -.5163255 |
| Maine2015         | -1.644197 | 3.31703   | -0.50 | 0.620 | -8.159716 | 4.871322  |
| Maine2016         | -1.771291 | 1.494307  | -1.19 | 0.236 | -4.706503 | 1.163921  |
| Maine2017         | 7.15266   | 2.176161  | 3.29  | 0.001 | 2.878107  | 11.42721  |
| Maine2018         | 0         | (omitted) |       |       |           |           |
| Maryland2009      | -20.4847  | 6.065635  | -3.38 | 0.001 | -32.39921 | -8.570201 |
| Maryland2010      | -22.51003 | 7.102753  | -3.17 | 0.002 | -36.4617  | -8.558352 |
| Maryland2011      | -21.63149 | 6.837491  | -3.16 | 0.002 | -35.06212 | -8.200861 |
| Maryland2012      | -21.17447 | 6.08525   | -3.48 | 0.001 | -33.1275  | -9.221436 |
| Maryland2013      | -21.18236 | 5.988411  | -3.54 | 0.000 | -32.94518 | -9.419549 |
| Maryland2014      | -18.84313 | 5.553     | -3.39 | 0.001 | -29.75069 | -7.935582 |
| Maryland2015      | -13.94955 | 4.853113  | -2.87 | 0.004 | -23.48234 | -4.416754 |
| Maryland2016      | -6.532757 | 5.252546  | -1.24 | 0.214 | -16.85014 | 3.784626  |
| Maryland2017      | -4.636301 | 3.144945  | -1.47 | 0.141 | -10.8138  | 1.541198  |
| Maryland2018      | 0         | (omitted) |       |       |           |           |
| Massachusetts2009 | -16.8075  | 3.42      | -4.91 | 0.000 | -23.52528 | -10.08972 |
| Massachusetts2010 | -19.06344 | 3.387716  | -5.63 | 0.000 | -25.71781 | -12.40908 |
| Massachusetts2011 | -19.85712 | 4.006464  | -4.96 | 0.000 | -27.72687 | -11.98737 |
| Massachusetts2012 | -17.45998 | 3.196747  | -5.46 | 0.000 | -23.73923 | -11.18073 |
| Massachusetts2013 | -15.28883 | 2.918145  | -5.24 | 0.000 | -21.02084 | -9.556827 |
| Massachusetts2014 | -13.2737  | 3.397496  | -3.91 | 0.000 | -19.94727 | -6.600122 |
| Massachusetts2015 | -4.359247 | 2.92346   | -1.49 | 0.136 | -10.10169 | 1.383197  |
| Massachusetts2016 | -.8239097 | 2.308244  | -0.36 | 0.721 | -5.357909 | 3.71009   |
| Massachusetts2017 | -6.425717 | 3.179155  | -2.02 | 0.044 | -12.67041 | -.1810196 |
| Massachusetts2018 | 0         | (omitted) |       |       |           |           |
| Michigan2009      | -2.424729 | 3.65532   | -0.66 | 0.507 | -9.604739 | 4.755281  |
| Michigan2010      | -3.720966 | 4.074241  | -0.91 | 0.361 | -11.72385 | 4.281915  |
| Michigan2011      | -3.635499 | 3.732554  | -0.97 | 0.330 | -10.96722 | 3.696219  |
| Michigan2012      | -5.050744 | 3.743427  | -1.35 | 0.178 | -12.40382 | 2.302331  |
| Michigan2013      | -5.257779 | 3.503927  | -1.50 | 0.134 | -12.14041 | 1.624856  |
| Michigan2014      | -6.329717 | 4.05504   | -1.56 | 0.119 | -14.29488 | 1.635449  |
| Michigan2015      | -2.317171 | 3.276822  | -0.71 | 0.480 | -8.753711 | 4.119369  |
| Michigan2016      | -.9150924 | 1.658592  | -0.55 | 0.581 | -4.173004 | 2.342819  |
| Michigan2017      | -2.024161 | 2.268572  | -0.89 | 0.373 | -6.480234 | 2.431912  |
| Michigan2018      | 0         | (omitted) |       |       |           |           |
| Minnesota2009     | 9.470558  | 3.549719  | 2.67  | 0.008 | 2.497976  | 16.44314  |
| Minnesota2010     | 7.595525  | 3.875684  | 1.96  | 0.051 | -.0173382 | 15.20839  |
| Minnesota2011     | 7.532996  | 3.820019  | 1.97  | 0.049 | .0294731  | 15.03652  |
| Minnesota2012     | 7.563859  | 3.521553  | 2.15  | 0.032 | .6466023  | 14.48112  |
| Minnesota2013     | 5.186198  | 3.554466  | 1.46  | 0.145 | -1.795709 | 12.16811  |
| Minnesota2014     | .1093295  | 3.888199  | 0.03  | 0.978 | -7.528116 | 7.746775  |
| Minnesota2015     | 6.352482  | 3.26464   | 1.95  | 0.052 | -.060129  | 12.76509  |
| Minnesota2016     | 3.06891   | 1.910095  | 1.61  | 0.109 | -.6830185 | 6.820838  |
| Minnesota2017     | .8960649  | 2.733686  | 0.33  | 0.743 | -4.473613 | 6.265743  |
| Minnesota2018     | 0         | (omitted) |       |       |           |           |
| Mississippi2015   | 4.245548  | 2.779691  | 1.53  | 0.127 | -1.214495 | 9.705592  |
| Mississippi2016   | -.6622336 | 1.655903  | -0.40 | 0.689 | -3.914863 | 2.590396  |
| Mississippi2017   | -.3479345 | 2.300958  | -0.15 | 0.880 | -4.867621 | 4.171752  |
| Mississippi2018   | 0         | (omitted) |       |       |           |           |
| Missouri2009      | -10.36556 | 7.298118  | -1.42 | 0.156 | -24.70099 | 3.96986   |
| Missouri2010      | -9.542442 | 7.710243  | -1.24 | 0.216 | -24.68739 | 5.602503  |
| Missouri2011      | -9.945848 | 6.087986  | -1.63 | 0.103 | -21.90425 | 2.012558  |
| Missouri2012      | -13.43681 | 6.818091  | -1.97 | 0.049 | -26.82933 | -.0442822 |
| Missouri2013      | -13.04025 | 5.654083  | -2.31 | 0.021 | -24.14635 | -1.934141 |
| Missouri2014      | -12.29101 | 5.702345  | -2.16 | 0.032 | -23.49192 | -1.090106 |
| Missouri2015      | -10.46085 | 5.830908  | -1.79 | 0.073 | -21.91429 | .9925851  |
| Missouri2016      | -6.220676 | 2.55782   | -2.43 | 0.015 | -11.24491 | -1.196445 |
| Missouri2017      | -9.414358 | 2.681378  | -3.51 | 0.000 | -14.68129 | -4.147425 |
| Missouri2018      | 0         | (omitted) |       |       |           |           |

|                    |           |           |       |       |           |           |
|--------------------|-----------|-----------|-------|-------|-----------|-----------|
| Nebraska2009       | 12.27961  | 2.719868  | 4.51  | 0.000 | 6.937077  | 17.62215  |
| Nebraska2010       | 8.634653  | 2.95572   | 2.92  | 0.004 | 2.828842  | 14.44046  |
| Nebraska2011       | 7.483511  | 2.681465  | 2.79  | 0.005 | 2.216409  | 12.75061  |
| Nebraska2012       | 7.856626  | 2.563908  | 3.06  | 0.002 | 2.820436  | 12.89282  |
| Nebraska2014       | 1.705934  | 2.707602  | 0.63  | 0.529 | -3.612509 | 7.024377  |
| Nebraska2015       | 3.118696  | 2.304935  | 1.35  | 0.177 | -1.408803 | 7.646195  |
| Nebraska2016       | -2.04473  | .8562533  | -2.39 | 0.017 | -3.726637 | -.3628237 |
| Nebraska2017       | -4.155944 | 1.930079  | -2.15 | 0.032 | -7.947127 | -.3647614 |
| Nebraska2018       | 0         | (omitted) |       |       |           |           |
| Nevada2009         | 11.29474  | 3.428956  | 3.29  | 0.001 | 4.559372  | 18.03012  |
| Nevada2010         | 3.914383  | 8.76587   | 0.45  | 0.655 | -13.30409 | 21.13286  |
| Nevada2011         | 12.12512  | 3.494239  | 3.47  | 0.001 | 5.261511  | 18.98872  |
| Nevada2012         | 10.41961  | 2.993239  | 3.48  | 0.001 | 4.540104  | 16.29912  |
| Nevada2013         | 6.648759  | 2.784501  | 2.39  | 0.017 | 1.179267  | 12.11825  |
| Nevada2014         | -2.588231 | 5.219171  | -0.50 | 0.620 | -12.84005 | 7.663593  |
| Nevada2015         | 6.055987  | 2.488647  | 2.43  | 0.015 | 1.16763   | 10.94434  |
| Nevada2016         | 2.644706  | 1.456448  | 1.82  | 0.070 | -.2161413 | 5.505554  |
| Nevada2017         | -.6199594 | 2.290874  | -0.27 | 0.787 | -5.119839 | 3.87992   |
| Nevada2018         | 0         | (omitted) |       |       |           |           |
| New Hampshire2009  | -18.84765 | 3.773973  | -4.99 | 0.000 | -26.26073 | -11.43458 |
| New Hampshire2010  | -21.92696 | 3.212352  | -6.83 | 0.000 | -28.23686 | -15.61705 |
| New Hampshire2011  | -17.35461 | 3.379065  | -5.14 | 0.000 | -23.99199 | -10.71724 |
| New Hampshire2012  | -19.50337 | 3.456772  | -5.64 | 0.000 | -26.29338 | -12.71336 |
| New Hampshire2013  | -19.709   | 3.82702   | -5.15 | 0.000 | -27.22628 | -12.19173 |
| New Hampshire2014  | -6.275191 | 4.474601  | -1.40 | 0.161 | -15.06449 | 2.514103  |
| New Hampshire2015  | .7915658  | 3.024424  | 0.26  | 0.794 | -5.149199 | 6.732331  |
| New Hampshire2016  | 1.111197  | 3.086244  | 0.36  | 0.719 | -4.950999 | 7.173393  |
| New Hampshire2017  | -5.56968  | 3.179898  | -1.75 | 0.080 | -11.81584 | .676476   |
| New Hampshire2018  | 0         | (omitted) |       |       |           |           |
| New Jersey2010     | -19.69748 | 4.251048  | -4.63 | 0.000 | -28.04766 | -11.3473  |
| New Jersey2011     | -18.97947 | 3.995283  | -4.75 | 0.000 | -26.82725 | -11.13168 |
| New Jersey2012     | -16.90221 | 3.914192  | -4.32 | 0.000 | -24.59071 | -9.213704 |
| New Jersey2013     | -18.23628 | 3.387734  | -5.38 | 0.000 | -24.89068 | -11.58188 |
| New Jersey2014     | -19.69381 | 3.9648    | -4.97 | 0.000 | -27.48172 | -11.9059  |
| New Jersey2015     | -16.40421 | 3.270675  | -5.02 | 0.000 | -22.82867 | -9.979739 |
| New Jersey2016     | -13.93055 | 2.908274  | -4.79 | 0.000 | -19.64317 | -8.217939 |
| New Jersey2017     | -8.307132 | 2.364101  | -3.51 | 0.000 | -12.95085 | -3.663415 |
| New Jersey2018     | 0         | (omitted) |       |       |           |           |
| New Mexico2009     | 2.85407   | 2.703239  | 1.06  | 0.292 | -2.455802 | 8.163941  |
| New Mexico2010     | .5350722  | 3.036115  | 0.18  | 0.860 | -5.428657 | 6.498801  |
| New Mexico2011     | 1.59234   | 2.770595  | 0.57  | 0.566 | -3.849837 | 7.034517  |
| New Mexico2012     | 8.167047  | 2.799265  | 2.92  | 0.004 | 2.668555  | 13.66554  |
| New Mexico2013     | 2.322616  | 3.35214   | 0.69  | 0.489 | -4.261868 | 8.9071    |
| New Mexico2014     | 11.43176  | 5.209602  | 2.19  | 0.029 | 1.198729  | 21.66478  |
| New Mexico2015     | 6.042322  | 3.598378  | 1.68  | 0.094 | -1.02584  | 13.11048  |
| New Mexico2016     | 1.63389   | 1.100057  | 1.49  | 0.138 | -.526912  | 3.794692  |
| New Mexico2017     | -3.006227 | 2.434974  | -1.23 | 0.218 | -7.789157 | 1.776703  |
| New Mexico2018     | 0         | (omitted) |       |       |           |           |
| New York2009       | -3.661703 | 3.31458   | -1.10 | 0.270 | -10.17241 | 2.849004  |
| New York2010       | -5.118284 | 3.194031  | -1.60 | 0.110 | -11.3922  | 1.155632  |
| New York2011       | -3.464951 | 2.987433  | -1.16 | 0.247 | -9.333056 | 2.403154  |
| New York2012       | -2.589753 | 2.862182  | -0.90 | 0.366 | -8.211832 | 3.032326  |
| New York2013       | -4.546237 | 2.627878  | -1.73 | 0.084 | -9.70808  | .6156063  |
| New York2014       | -5.8981   | 3.096895  | -1.90 | 0.057 | -11.98122 | .1850159  |
| New York2015       | -1.15374  | 2.760902  | -0.42 | 0.676 | -6.576877 | 4.269397  |
| New York2016       | -.0527525 | 1.769825  | 0.03  | 0.976 | -3.42365  | 3.529155  |
| New York2017       | -2.595689 | 2.289804  | -1.13 | 0.257 | -7.093467 | 1.902088  |
| New York2018       | 0         | (omitted) |       |       |           |           |
| North Carolina2009 | -2.053124 | 3.214105  | -0.64 | 0.523 | -8.366472 | 4.260225  |
| North Carolina2010 | -2.793357 | 3.318058  | -0.84 | 0.400 | -9.310896 | 3.724183  |
| North Carolina2011 | -2.917485 | 2.978599  | -0.98 | 0.328 | -8.768237 | 2.933266  |
| North Carolina2012 | -3.554315 | 3.012703  | -1.18 | 0.239 | -9.472056 | 2.363425  |
| North Carolina2013 | -5.232427 | 2.836875  | -1.84 | 0.066 | -10.8048  | .3399422  |
| North Carolina2014 | -5.69456  | 3.171793  | -1.80 | 0.073 | -11.9248  | .5356757  |
| North Carolina2015 | -1.82119  | 2.680088  | -0.68 | 0.497 | -7.085589 | 3.443208  |
| North Carolina2016 | -3.844191 | 1.818548  | -2.11 | 0.035 | -7.416298 | -.2720845 |
| North Carolina2017 | .4225719  | 2.349395  | 0.18  | 0.857 | -4.192257 | 5.037401  |
| North Carolina2018 | 0         | (omitted) |       |       |           |           |
| North Dakota2016   | 0         | (omitted) |       |       |           |           |
| Ohio2009           | -18.61333 | 3.822429  | -4.87 | 0.000 | -26.12159 | -11.10508 |
| Ohio2010           | -14.60943 | 4.06877   | -3.59 | 0.000 | -22.60156 | -6.61729  |
| Ohio2011           | -14.68531 | 3.664303  | -4.01 | 0.000 | -21.88296 | -7.487655 |
| Ohio2012           | -12.52974 | 3.722994  | -3.37 | 0.001 | -19.84268 | -5.216803 |
| Ohio2013           | -13.97473 | 3.357824  | -4.16 | 0.000 | -20.57038 | -7.37908  |
| Ohio2014           | -7.885877 | 3.333762  | -2.37 | 0.018 | -14.43426 | -1.337492 |
| Ohio2015           | 1.495753  | 2.912018  | 0.51  | 0.608 | -4.224217 | 7.215722  |

|                    |           |           |       |       |           |           |
|--------------------|-----------|-----------|-------|-------|-----------|-----------|
| Ohio2016           | 4.640457  | 2.285135  | 2.03  | 0.043 | .1518499  | 9.129064  |
| Ohio2017           | 6.136081  | 2.855123  | 2.15  | 0.032 | .5278683  | 11.74429  |
| Ohio2018           | 0         | (omitted) |       |       |           |           |
| Oklahoma2009       | 15.33862  | 3.151345  | 4.87  | 0.000 | 9.148549  | 21.52869  |
| Oklahoma2010       | 14.32159  | 3.221574  | 4.45  | 0.000 | 7.993574  | 20.64961  |
| Oklahoma2011       | 9.541663  | 3.168847  | 3.01  | 0.003 | 3.317214  | 15.76611  |
| Oklahoma2012       | 11.78723  | 2.92234   | 4.03  | 0.000 | 6.046988  | 17.52748  |
| Oklahoma2013       | 8.518374  | 2.539947  | 3.35  | 0.001 | 3.529249  | 13.5075   |
| Oklahoma2014       | -2.832553 | 4.179748  | -0.68 | 0.498 | -11.04268 | 5.377572  |
| Oklahoma2015       | 6.226535  | 2.402828  | 2.59  | 0.010 | 1.50675   | 10.94632  |
| Oklahoma2016       | 3.356174  | .9603273  | 3.49  | 0.001 | 1.469839  | 5.242509  |
| Oklahoma2017       | -1.037615 | 2.022126  | -0.51 | 0.608 | -5.009602 | 2.934373  |
| Oklahoma2018       | 0         | (omitted) |       |       |           |           |
| Oregon2009         | 11.9347   | 2.901636  | 4.11  | 0.000 | 6.235121  | 17.63427  |
| Oregon2010         | 7.591683  | 3.111499  | 2.44  | 0.015 | 1.47988   | 13.70349  |
| Oregon2011         | 9.352334  | 2.944037  | 3.18  | 0.002 | 3.569471  | 15.1352   |
| Oregon2012         | 9.015305  | 3.143947  | 2.87  | 0.004 | 2.839766  | 15.19084  |
| Oregon2013         | 4.339609  | 2.982858  | 1.45  | 0.146 | -1.519509 | 10.19873  |
| Oregon2014         | 2.354459  | 3.092725  | 0.76  | 0.447 | -3.720467 | 8.429384  |
| Oregon2015         | 3.528024  | 2.685262  | 1.31  | 0.189 | -1.746536 | 8.802585  |
| Oregon2016         | -2.632707 | 2.473381  | -1.06 | 0.288 | -7.491077 | 2.225664  |
| Oregon2017         | -3.292847 | 2.067778  | -1.59 | 0.112 | -7.354508 | .768814   |
| Oregon2018         | 0         | (omitted) |       |       |           |           |
| Pennsylvania2009   | -8.060292 | 3.638816  | -2.22 | 0.027 | -15.20788 | -.9127003 |
| Pennsylvania2010   | -10.81304 | 4.043896  | -2.67 | 0.008 | -18.75632 | -2.869768 |
| Pennsylvania2011   | -11.16763 | 3.094935  | -3.61 | 0.000 | -17.24689 | -5.08836  |
| Pennsylvania2012   | -12.42032 | 3.150963  | -3.94 | 0.000 | -18.60964 | -6.230998 |
| Pennsylvania2013   | -11.03759 | 3.121656  | -3.54 | 0.000 | -17.16935 | -4.905839 |
| Pennsylvania2014   | -12.75425 | 3.595481  | -3.55 | 0.000 | -19.81672 | -5.691776 |
| Pennsylvania2015   | -6.715143 | 3.283486  | -2.05 | 0.041 | -13.16477 | -.2655128 |
| Pennsylvania2016   | -.1260746 | 3.347391  | -0.04 | 0.970 | -6.70123  | 6.449081  |
| Pennsylvania2017   | -3.447446 | 3.6969    | -0.93 | 0.351 | -10.70913 | 3.814239  |
| Pennsylvania2018   | 0         | (omitted) |       |       |           |           |
| Rhode Island2009   | -8.470549 | 2.458987  | -3.44 | 0.001 | -13.30065 | -3.640452 |
| Rhode Island2010   | -9.887093 | 3.199457  | -3.09 | 0.002 | -16.17167 | -3.602517 |
| Rhode Island2011   | -8.88462  | 3.007917  | -2.95 | 0.003 | -14.79296 | -2.97628  |
| Rhode Island2012   | -6.571147 | 2.771927  | -2.37 | 0.018 | -12.01594 | -1.126353 |
| Rhode Island2013   | -4.371268 | 2.391343  | -1.83 | 0.068 | -9.068495 | .3259593  |
| Rhode Island2014   | -5.745612 | 4.505313  | -1.28 | 0.203 | -14.59523 | 3.104007  |
| Rhode Island2015   | .6200534  | 3.348019  | 0.19  | 0.853 | -5.956337 | 7.196444  |
| Rhode Island2016   | -3.648819 | 2.714649  | -1.34 | 0.179 | -8.981104 | 1.683466  |
| Rhode Island2017   | -6.931428 | 3.515619  | -1.97 | 0.049 | -13.83703 | -.0258283 |
| Rhode Island2018   | 0         | (omitted) |       |       |           |           |
| South Carolina2009 | 2.851309  | 4.118548  | 0.69  | 0.489 | -5.238602 | 10.94122  |
| South Carolina2010 | .9725135  | 4.556392  | 0.21  | 0.831 | -7.977439 | 9.922466  |
| South Carolina2011 | 1.476197  | 3.765451  | 0.39  | 0.695 | -5.920139 | 8.872532  |
| South Carolina2012 | .0630432  | 2.962928  | 0.02  | 0.983 | -5.756927 | 5.883013  |
| South Carolina2013 | -4.157869 | 2.81359   | -1.48 | 0.140 | -9.6845   | 1.368762  |
| South Carolina2014 | -3.336485 | 3.169028  | -1.05 | 0.293 | -9.56129  | 2.888319  |
| South Carolina2015 | -1.013623 | 2.917161  | -0.35 | 0.728 | -6.743694 | 4.716448  |
| South Carolina2016 | -3.010843 | 1.887121  | -1.60 | 0.111 | -6.717644 | .6959592  |
| South Carolina2017 | -4.890367 | 2.363733  | -2.07 | 0.039 | -9.53336  | -.2473734 |
| South Carolina2018 | 0         | (omitted) |       |       |           |           |
| Tennessee2009      | -7.138902 | 4.624611  | -1.54 | 0.123 | -16.22285 | 1.945051  |
| Tennessee2010      | -6.819442 | 4.722289  | -1.44 | 0.149 | -16.09526 | 2.456376  |
| Tennessee2011      | -8.058708 | 5.054035  | -1.59 | 0.111 | -17.98616 | 1.868747  |
| Tennessee2012      | -6.134877 | 4.95289   | -1.24 | 0.216 | -15.86366 | 3.593902  |
| Tennessee2013      | -9.482574 | 6.088331  | -1.56 | 0.120 | -21.44166 | 2.476509  |
| Tennessee2014      | -8.719197 | 4.001289  | -2.18 | 0.030 | -16.57878 | -.8596117 |
| Tennessee2015      | -3.928608 | 3.21559   | -1.22 | 0.222 | -10.24487 | 2.387657  |
| Tennessee2016      | -4.348944 | 2.038029  | -2.13 | 0.033 | -8.352168 | -.34572   |
| Tennessee2017      | -6.476192 | 2.720467  | -2.38 | 0.018 | -11.8199  | -1.13248  |
| Tennessee2018      | 0         | (omitted) |       |       |           |           |
| Texas2009          | 5.094937  | 3.025664  | 1.68  | 0.093 | -.8482619 | 11.03814  |
| Texas2010          | 2.759318  | 3.654713  | 0.76  | 0.451 | -4.4195   | 9.938136  |
| Texas2011          | 2.534602  | 3.231655  | 0.78  | 0.433 | -3.813219 | 8.882423  |
| Texas2012          | 3.253071  | 2.960421  | 1.10  | 0.272 | -2.561976 | 9.068117  |
| Texas2013          | -.2754272 | 2.646976  | -0.10 | 0.917 | -5.474785 | 4.92393   |
| Texas2014          | -.5724811 | 2.953909  | -0.19 | 0.846 | -6.374734 | 5.229772  |
| Texas2015          | 1.975323  | 2.391992  | 0.83  | 0.409 | -2.723178 | 6.673824  |
| Texas2016          | -1.193779 | .8787202  | -1.36 | 0.175 | -2.919817 | .5322582  |
| Texas2017          | -3.756959 | 1.997195  | -1.88 | 0.060 | -7.679975 | .1660576  |
| Texas2018          | 0         | (omitted) |       |       |           |           |
| Utah2009           | 7.505055  | 2.813224  | 2.67  | 0.008 | 1.979143  | 13.03097  |
| Utah2010           | 3.247107  | 3.35659   | 0.97  | 0.334 | -3.346119 | 9.840332  |
| Utah2011           | 5.312508  | 3.395609  | 1.56  | 0.118 | -1.357362 | 11.98238  |



|                   |           |                                   |       |       |           |          |
|-------------------|-----------|-----------------------------------|-------|-------|-----------|----------|
| Utah2012          | 6.9243    | 2.796585                          | 2.48  | 0.014 | 1.43107   | 12.41753 |
| Utah2013          | 1.747684  | 2.544276                          | 0.69  | 0.492 | -3.249943 | 6.745312 |
| Utah2014          | 3.751642  | 2.923723                          | 1.28  | 0.200 | -1.99132  | 9.494604 |
| Utah2015          | 5.289472  | 2.641537                          | 2.00  | 0.046 | .1007982  | 10.47815 |
| Utah2016          | .1291874  | 1.19539                           | 0.11  | 0.914 | -2.218872 | 2.477247 |
| Utah2017          | -6.926834 | 3.627037                          | -1.91 | 0.057 | -14.05129 | .1976207 |
| Utah2018          | 0         | (omitted)                         |       |       |           |          |
| Vermont2015       | 20.1952   | 1.420768                          | 14.21 | 0.000 | 17.40444  | 22.98596 |
| Vermont2016       | 19.84232  | 1.534154                          | 12.93 | 0.000 | 16.82883  | 22.8558  |
| Vermont2017       | 0         | (omitted)                         |       |       |           |          |
| Vermont2018       | 0         | (omitted)                         |       |       |           |          |
| Virginia2009      | -.6785798 | 3.367103                          | -0.20 | 0.840 | -7.292456 | 5.935296 |
| Virginia2010      | -4.324672 | 3.927765                          | -1.10 | 0.271 | -12.03984 | 3.390492 |
| Virginia2011      | -2.333876 | 3.704631                          | -0.63 | 0.529 | -9.610746 | 4.942994 |
| Virginia2012      | -2.165713 | 3.278467                          | -0.66 | 0.509 | -8.605486 | 4.274059 |
| Virginia2013      | -4.080501 | 3.158736                          | -1.29 | 0.197 | -10.28509 | 2.124087 |
| Virginia2014      | -4.196855 | 4.002108                          | -1.05 | 0.295 | -12.05805 | 3.664337 |
| Virginia2015      | -2.303032 | 3.931074                          | -0.59 | 0.558 | -10.02469 | 5.418631 |
| Virginia2016      | .9102905  | 2.173957                          | 0.42  | 0.676 | -3.359934 | 5.180515 |
| Virginia2017      | -3.276155 | 3.180639                          | -1.03 | 0.303 | -9.523768 | 2.971457 |
| Virginia2018      | 0         | (omitted)                         |       |       |           |          |
| Washington2009    | 8.901994  | 2.915287                          | 3.05  | 0.002 | 3.175604  | 14.62838 |
| Washington2010    | 5.516879  | 3.344304                          | 1.65  | 0.100 | -1.052214 | 12.08597 |
| Washington2011    | 6.895851  | 2.763184                          | 2.50  | 0.013 | 1.46823   | 12.32347 |
| Washington2012    | 3.876523  | 3.803648                          | 1.02  | 0.309 | -3.594842 | 11.34789 |
| Washington2013    | 2.127624  | 2.378077                          | 0.89  | 0.371 | -2.543544 | 6.798791 |
| Washington2014    | 1.205295  | 2.870851                          | 0.42  | 0.675 | -4.433811 | 6.844401 |
| Washington2015    | 3.029216  | 2.646235                          | 1.14  | 0.253 | -2.168686 | 8.227118 |
| Washington2016    | -1.005253 | 1.57893                           | -0.64 | 0.525 | -4.106687 | 2.096181 |
| Washington2017    | -4.837511 | 2.108477                          | -2.29 | 0.022 | -8.979115 | -.695908 |
| Washington2018    | 0         | (omitted)                         |       |       |           |          |
| West Virginia2010 | -17.3665  | 15.29143                          | -1.14 | 0.257 | -47.40289 | 12.6699  |
| West Virginia2011 | -5.1599   | 15.48195                          | -0.33 | 0.739 | -35.57053 | 25.25073 |
| West Virginia2012 | -18.72737 | 16.10833                          | -1.16 | 0.245 | -50.36837 | 12.91363 |
| West Virginia2013 | -18.57919 | 10.14689                          | -1.83 | 0.068 | -38.51036 | 1.351976 |
| West Virginia2014 | -12.77243 | 11.56267                          | -1.10 | 0.270 | -35.48455 | 9.939686 |
| West Virginia2015 | -4.195598 | 9.13018                           | -0.46 | 0.646 | -22.12967 | 13.73848 |
| West Virginia2016 | 5.467663  | 6.918483                          | 0.79  | 0.430 | -8.122057 | 19.05738 |
| West Virginia2017 | 13.812    | 8.063734                          | 1.71  | 0.087 | -2.02729  | 29.6513  |
| West Virginia2018 | 0         | (omitted)                         |       |       |           |          |
| Wisconsin2009     | 0         | (omitted)                         |       |       |           |          |
| Wisconsin2010     | 0         | (omitted)                         |       |       |           |          |
| Wisconsin2011     | 0         | (omitted)                         |       |       |           |          |
| Wisconsin2012     | 0         | (omitted)                         |       |       |           |          |
| Wisconsin2013     | 0         | (omitted)                         |       |       |           |          |
| Wisconsin2014     | 0         | (omitted)                         |       |       |           |          |
| Wisconsin2015     | 0         | (omitted)                         |       |       |           |          |
| Wisconsin2016     | 0         | (omitted)                         |       |       |           |          |
| Wisconsin2017     | 0         | (omitted)                         |       |       |           |          |
| Wisconsin2018     | 0         | (omitted)                         |       |       |           |          |
| _cons             | 136.3169  | 91.87683                          | 1.48  | 0.138 | -44.15336 | 316.7871 |
| sigma_u           | 19.685092 |                                   |       |       |           |          |
| sigma_e           | 5.7871972 |                                   |       |       |           |          |
| rho               | .92044635 | (fraction of variance due to u_i) |       |       |           |          |

COUNTY AND YEAR FIXED EFFECTS FOR CVD DEATH RATE (TABLE 2 SPECIFICATION 1)

Fixed-effects (within) regression  
 Group variable: county\_fip-e

Number of obs = 31,012  
 Number of groups = 3,150

R-sq:  
 within = 0.1569  
 between = 0.0012  
 overall = 0.0159

Obs per group:  
 min = 1  
 avg = 9.8  
 max = 10

corr(u\_i, Xb) = -0.1280  
 F(28,3149) = 89.36  
 Prob > F = 0.0000

(Std. Err. adjusted for 3,150 clusters in county\_fipscode)

|                      | Coef.     | Robust Std. Err.                  | t      | P> t  | [95% Conf. Interval] |           |
|----------------------|-----------|-----------------------------------|--------|-------|----------------------|-----------|
| cdc_heart_disease_~h |           |                                   |        |       |                      |           |
| acs_pct_female       | .3409742  | .4329923                          | 0.79   | 0.431 | -.5080014            | 1.18995   |
| acs_median_age       | 1.536069  | .3724445                          | 4.12   | 0.000 | .8058101             | 2.266327  |
| acs_pct_black        | -.0107354 | .2413531                          | -0.04  | 0.965 | -.4839606            | .4624899  |
| acs_pct_white        | -.0717861 | .1247179                          | -0.58  | 0.565 | -.3163227            | .1727505  |
| acs_pct_hispan       | .2419456  | .4314109                          | 0.56   | 0.575 | -.6039294            | 1.087821  |
| acs_pct_asian        | -.1054069 | .7548355                          | -0.14  | 0.889 | -1.585426            | 1.374612  |
| acs_pct_bachelor_dgr | -.3156336 | .2645122                          | -1.19  | 0.233 | -.8342674            | .2030002  |
| acs_median_hh_income | -.0000478 | .000145                           | -0.33  | 0.742 | -.0003321            | .0002366  |
| acs_pct_person_inc99 | -.1662807 | .1749954                          | -0.95  | 0.342 | -.5093973            | .1768359  |
| acs_pct_unemploy     | -.0497029 | .2940154                          | -0.17  | 0.866 | -.6261841            | .5267782  |
| acs_pct_grp_qrt      | .339881   | .2730854                          | 1.24   | 0.213 | -.1955622            | .8753243  |
| acs_pct_va           | -.4632768 | .3455583                          | -1.34  | 0.180 | -1.140819            | .2142655  |
| acs_pct_armed_forces | 1.62571   | .4766393                          | 3.41   | 0.001 | .6911547             | 2.560265  |
| ahrf_fed_hlth_cnt    | -.1742908 | .0752576                          | -2.32  | 0.021 | -.3218498            | -.0267318 |
| ahrf_rural_h_clinic  | -.4186592 | .4115517                          | -1.02  | 0.309 | -1.225596            | .3882775  |
| acs_total_household  | .0000378  | .0000815                          | 0.46   | 0.643 | -.000122             | .0001976  |
| acs_pct_rented_hh    | .1158973  | .1644035                          | 0.70   | 0.481 | -.2064516            | .4382461  |
| acs_pct_mobile_home  | -.0127164 | .2073848                          | -0.06  | 0.951 | -.4193395            | .3939067  |
| acs_total_pop_wt     | -.0000121 | .0000238                          | -0.51  | 0.610 | -.0000587            | .0000345  |
| year                 |           |                                   |        |       |                      |           |
| 2010                 | -5.879618 | .9785821                          | -6.01  | 0.000 | -7.798341            | -3.960894 |
| 2011                 | -13.07198 | .8289839                          | -15.77 | 0.000 | -14.69738            | -11.44657 |
| 2012                 | -17.47782 | 1.098018                          | -15.92 | 0.000 | -19.63072            | -15.32491 |
| 2013                 | -20.86791 | 1.30212                           | -16.03 | 0.000 | -23.421              | -18.31482 |
| 2014                 | -22.49694 | 1.487577                          | -15.12 | 0.000 | -25.41365            | -19.58022 |
| 2015                 | -22.61685 | 1.656489                          | -13.65 | 0.000 | -25.86476            | -19.36895 |
| 2016                 | -23.29069 | 1.894173                          | -12.30 | 0.000 | -27.00462            | -19.57675 |
| 2017                 | -23.56686 | 2.143632                          | -10.99 | 0.000 | -27.76992            | -19.3638  |
| 2018                 | -25.53    | 2.397627                          | -10.65 | 0.000 | -30.23107            | -20.82893 |
| _cons                | 326.9273  | 30.95671                          | 10.56  | 0.000 | 266.2299             | 387.6247  |
| sigma_u              | 56.78993  |                                   |        |       |                      |           |
| sigma_e              | 22.02403  |                                   |        |       |                      |           |
| rho                  | .86926206 | (fraction of variance due to u_i) |        |       |                      |           |

COUNTY, YEAR, & STATE-BY-YEAR FIXED EFFECTS FOR CVD DEATH RATE (TABLE 2 SPECIFICATION 2)

Fixed-effects (within) regression  
 Group variable: county\_fip-e  
 Number of obs = 31,012  
 Number of groups = 3,150

R-sq:  
 within = 0.1814  
 between = 0.1238  
 overall = 0.1413  
 Obs per group:  
 min = 1  
 avg = 9.8  
 max = 10

corr(u\_i, Xb) = 0.1159  
 F(458,3149) = 4741.46  
 Prob > F = 0.0000

(Std. Err. adjusted for 3,150 clusters in county\_fipscode)

| cdc_heart_disease_de-h | Coef.     | Robust Std. Err. | t     | P> t  | [95% Conf. Interval] |           |
|------------------------|-----------|------------------|-------|-------|----------------------|-----------|
| acs_pct_female         | .3979829  | .4319126         | 0.92  | 0.357 | -.4488757            | 1.244842  |
| acs_median_age         | .9442199  | .4001888         | 2.36  | 0.018 | .1595627             | 1.728877  |
| acs_pct_black          | .1794991  | .2397232         | 0.75  | 0.454 | -.2905303            | .6495285  |
| acs_pct_white          | -.2094997 | .1254058         | -1.67 | 0.095 | -.455385             | .0363857  |
| acs_pct_hispan         | .0770919  | .461046          | 0.17  | 0.867 | -.8268891            | .981073   |
| acs_pct_asian          | .3603354  | .7752729         | 0.46  | 0.642 | -1.159756            | 1.880427  |
| acs_pct_bachelor_dgr   | -.2792628 | .263056          | -1.06 | 0.288 | -.7950413            | .2365157  |
| acs_median_hh_income   | -.0002255 | .0001522         | -1.48 | 0.138 | -.0005239            | .0000728  |
| acs_pct_person_inc99   | -.1712101 | .1814317         | -0.94 | 0.345 | -.5269464            | .1845261  |
| acs_pct_unemploy       | .0870857  | .3142549         | 0.28  | 0.782 | -.5290795            | .7032508  |
| acs_pct_grp_qrt        | .3501566  | .2665062         | 1.31  | 0.189 | -.1723869            | .8727     |
| acs_pct_va             | -.1184386 | .3484473         | -0.34 | 0.734 | -.8016453            | .5647681  |
| acs_pct_armed_forces   | 1.298195  | .4737176         | 2.74  | 0.006 | .3693691             | 2.227022  |
| ahrf_fed_hlth_cnt      | -.023582  | .0711803         | -0.33 | 0.740 | -.1631464            | .1159824  |
| ahrf_rural_h_clinic    | -.5452554 | .4158551         | -1.31 | 0.190 | -1.36063             | .2701191  |
| acs_total_household    | -.0000278 | .0000833         | -0.33 | 0.739 | -.000191             | .0001355  |
| acs_pct_rented_hh      | .15963    | .1651907         | 0.97  | 0.334 | -.1642622            | .4835222  |
| acs_pct_mobile_home    | .0083726  | .2116054         | 0.04  | 0.968 | -.4065259            | .4232711  |
| acs_total_pop_wt       | -9.09e-06 | .0000239         | -0.38 | 0.704 | -.000056             | .0000378  |
| year                   |           |                  |       |       |                      |           |
| 2010                   | -5.707472 | 4.53021          | -1.26 | 0.208 | -14.58993            | 3.17499   |
| 2011                   | -17.18498 | 6.121473         | -2.81 | 0.005 | -29.18746            | -5.182496 |
| 2012                   | -17.32925 | 6.911407         | -2.51 | 0.012 | -30.88057            | -3.777932 |
| 2013                   | -21.79299 | 8.377083         | -2.60 | 0.009 | -38.21808            | -5.36789  |
| 2014                   | -17.28065 | 7.452705         | -2.32 | 0.020 | -31.8933             | -2.668003 |
| 2015                   | -21.26258 | 8.484871         | -2.51 | 0.012 | -37.89901            | -4.626141 |
| 2016                   | -17.91365 | 7.973233         | -2.25 | 0.025 | -33.54691            | -2.280389 |
| 2017                   | -21.76537 | 9.874971         | -2.20 | 0.028 | -41.1274             | -2.403342 |
| 2018                   | -22.51939 | 8.685079         | -2.59 | 0.010 | -39.54838            | -5.490401 |
| state_year_num         |           |                  |       |       |                      |           |
| Alabama2010            | 2.072172  | 4.990205         | 0.42  | 0.678 | -7.71221             | 11.85655  |
| Alabama2011            | 9.697211  | 6.863953         | 1.41  | 0.158 | -3.761062            | 23.15548  |
| Alabama2012            | 2.219945  | 7.731686         | 0.29  | 0.774 | -12.93971            | 17.3796   |
| Alabama2013            | 1.596966  | 9.217041         | 0.17  | 0.862 | -16.47505            | 19.66898  |
| Alabama2014            | -7.766198 | 8.543658         | -0.91 | 0.363 | -24.5179             | 8.985504  |
| Alabama2015            | .1053774  | 9.435286         | 0.01  | 0.991 | -18.39455            | 18.60531  |
| Alabama2016            | -5.498019 | 8.887112         | -0.62 | 0.536 | -22.92314            | 11.9271   |
| Alabama2017            | -1.548682 | 10.71445         | -0.14 | 0.885 | -22.55668            | 19.45932  |
| Alabama2018            | -4.95405  | 9.686022         | -0.51 | 0.609 | -23.9456             | 14.0375   |
| Alaska2009             | 1.061824  | 14.52395         | 0.07  | 0.942 | -27.41553            | 29.53918  |
| Alaska2010             | 19.34471  | 14.55774         | 1.33  | 0.184 | -9.198904            | 47.88833  |
| Alaska2011             | 24.24133  | 13.62243         | 1.78  | 0.075 | -2.468416            | 50.95107  |
| Alaska2012             | 10.04568  | 14.54087         | 0.69  | 0.490 | -18.46486            | 38.55623  |
| Alaska2013             | 1.911391  | 12.02788         | 0.16  | 0.874 | -21.67189            | 25.49467  |
| Alaska2014             | -10.75251 | 11.26952         | -0.95 | 0.340 | -32.84885            | 11.34384  |
| Alaska2015             | -.9997054 | 9.940001         | -0.10 | 0.920 | -20.48924            | 18.48983  |
| Alaska2016             | 2.219856  | 8.258867         | 0.27  | 0.788 | -13.97345            | 18.41316  |
| Alaska2017             | 8.420414  | 6.54201          | 1.29  | 0.198 | -4.406619            | 21.24745  |
| Alaska2018             | 0         | (omitted)        |       |       |                      |           |
| Arizona2009            | -9.300394 | 9.371187         | -0.99 | 0.321 | -27.67465            | 9.073858  |
| Arizona2010            | -15.75053 | 9.700822         | -1.62 | 0.105 | -34.7711             | 3.270044  |
| Arizona2011            | -3.303889 | 7.887166         | -0.42 | 0.675 | -18.7684             | 12.16062  |
| Arizona2012            | -4.477725 | 7.204676         | -0.62 | 0.534 | -18.60406            | 9.64861   |
| Arizona2013            | -.9242952 | 6.575355         | -0.14 | 0.888 | -13.81671            | 11.96812  |

|                       |           |           |       |       |           |          |
|-----------------------|-----------|-----------|-------|-------|-----------|----------|
| Arizona2014           | -9.186741 | 5.924683  | -1.55 | 0.121 | -20.80337 | 2.42989  |
| Arizona2015           | -6.450192 | 5.518776  | -1.17 | 0.243 | -17.27095 | 4.37057  |
| Arizona2016           | -6.99532  | 5.612069  | -1.25 | 0.213 | -17.999   | 4.008363 |
| Arizona2017           | -1.654316 | 4.3607    | -0.38 | 0.704 | -10.20442 | 6.895787 |
| Arizona2018           | 0         | (omitted) |       |       |           |          |
| Arkansas2009          | .745734   | 10.2854   | 0.07  | 0.942 | -19.42102 | 20.91249 |
| Arkansas2010          | 1.953096  | 9.604929  | 0.20  | 0.839 | -16.87946 | 20.78565 |
| Arkansas2011          | 3.870332  | 8.767734  | 0.44  | 0.659 | -13.32072 | 21.06138 |
| Arkansas2012          | -1.226631 | 7.793855  | -0.16 | 0.875 | -16.50818 | 14.05492 |
| Arkansas2013          | -.8217233 | 7.213693  | -0.11 | 0.909 | -14.96574 | 13.32229 |
| Arkansas2014          | -6.731029 | 6.518154  | -1.03 | 0.302 | -19.51129 | 6.04923  |
| Arkansas2015          | -1.274651 | 6.206051  | -0.21 | 0.837 | -13.44296 | 10.89366 |
| Arkansas2016          | -3.238254 | 6.247244  | -0.52 | 0.604 | -15.48734 | 9.010827 |
| Arkansas2017          | 4.588617  | 4.039144  | 1.14  | 0.256 | -3.331004 | 12.50824 |
| Arkansas2018          | 0         | (omitted) |       |       |           |          |
| California2009        | 4.731449  | 8.957414  | 0.53  | 0.597 | -12.83151 | 22.29441 |
| California2010        | 3.010441  | 8.553665  | 0.35  | 0.725 | -13.76088 | 19.78176 |
| California2011        | 9.335211  | 7.871866  | 1.19  | 0.236 | -6.099296 | 24.76972 |
| California2012        | 6.521423  | 6.687415  | 0.98  | 0.330 | -6.590709 | 19.63356 |
| California2013        | 7.015431  | 6.015378  | 1.17  | 0.244 | -4.779026 | 18.80989 |
| California2014        | -3.88494  | 5.576497  | -0.70 | 0.486 | -14.81888 | 7.048997 |
| California2015        | -.5974682 | 5.700789  | -0.10 | 0.917 | -11.77511 | 10.58017 |
| California2016        | -5.601411 | 5.741246  | -0.98 | 0.329 | -16.85837 | 5.655551 |
| California2017        | -.1039785 | 4.441356  | -0.02 | 0.981 | -8.812224 | 8.604266 |
| California2018        | 0         | (omitted) |       |       |           |          |
| Colorado2009          | 5.900461  | 9.863958  | 0.60  | 0.550 | -13.43998 | 25.2409  |
| Colorado2010          | 4.080509  | 9.278341  | 0.44  | 0.660 | -14.1117  | 22.27272 |
| Colorado2011          | 11.19732  | 8.068447  | 1.39  | 0.165 | -4.622625 | 27.01727 |
| Colorado2012          | 6.066449  | 7.000593  | 0.87  | 0.386 | -7.659738 | 19.79264 |
| Colorado2013          | 5.891133  | 6.741837  | 0.87  | 0.382 | -7.327706 | 19.10997 |
| Colorado2014          | -.8422072 | 7.108459  | -0.12 | 0.906 | -14.77989 | 13.09547 |
| Colorado2015          | 2.766246  | 6.456716  | 0.43  | 0.668 | -9.893551 | 15.42604 |
| Colorado2016          | .530805   | 6.505093  | 0.08  | 0.935 | -12.22385 | 13.28546 |
| Colorado2017          | 6.160405  | 4.354781  | 1.41  | 0.157 | -2.37809  | 14.6989  |
| Colorado2018          | 0         | (omitted) |       |       |           |          |
| Connecticut2009       | 7.462972  | 9.043052  | 0.83  | 0.409 | -10.2679  | 25.19384 |
| Connecticut2010       | 7.235042  | 8.48398   | 0.85  | 0.394 | -9.399648 | 23.86973 |
| Connecticut2011       | 15.07196  | 7.973677  | 1.89  | 0.059 | -.5621698 | 30.70609 |
| Connecticut2012       | 11.05003  | 6.661887  | 1.66  | 0.097 | -2.01205  | 24.11211 |
| Connecticut2013       | 12.41984  | 6.162945  | 2.02  | 0.044 | .3360494  | 24.50364 |
| Connecticut2014       | 2.470478  | 6.135096  | 0.40  | 0.687 | -9.558713 | 14.49967 |
| Connecticut2015       | 3.53465   | 5.392927  | 0.66  | 0.512 | -7.039357 | 14.10866 |
| Connecticut2016       | -3.753438 | 5.606609  | -0.67 | 0.503 | -14.74642 | 7.239539 |
| Connecticut2017       | -.1630664 | 3.605292  | -0.05 | 0.964 | -7.232027 | 6.905894 |
| Connecticut2018       | 0         | (omitted) |       |       |           |          |
| Delaware2009          | 3.716543  | 11.26351  | 0.33  | 0.741 | -18.36802 | 25.80111 |
| Delaware2010          | -.1400663 | 9.78264   | -0.01 | 0.989 | -19.32106 | 19.04093 |
| Delaware2011          | 9.206104  | 8.456709  | 1.09  | 0.276 | -7.375115 | 25.78732 |
| Delaware2012          | 1.77953   | 6.565331  | 0.27  | 0.786 | -11.09323 | 14.65229 |
| Delaware2013          | .7313702  | 5.602355  | 0.13  | 0.896 | -10.25327 | 11.71601 |
| Delaware2014          | -5.749548 | 4.850225  | -1.19 | 0.236 | -15.25947 | 3.760374 |
| Delaware2015          | -3.22531  | 5.326692  | -0.61 | 0.545 | -13.66945 | 7.21883  |
| Delaware2016          | -5.63654  | 5.879127  | -0.96 | 0.338 | -17.16385 | 5.890768 |
| Delaware2017          | -2.429172 | 4.164262  | -0.58 | 0.560 | -10.59411 | 5.735769 |
| Delaware2018          | 0         | (omitted) |       |       |           |          |
| Dist. of Columbia2009 | 14.92386  | 8.991393  | 1.66  | 0.097 | -2.705721 | 32.55344 |
| Dist. of Columbia2010 | 5.379915  | 8.313358  | 0.65  | 0.518 | -10.92023 | 21.68006 |
| Dist. of Columbia2011 | .3002757  | 7.369416  | 0.04  | 0.968 | -14.14907 | 14.74962 |
| Dist. of Columbia2012 | -1.194254 | 6.089402  | -0.20 | 0.845 | -13.13385 | 10.74534 |
| Dist. of Columbia2013 | .7999609  | 5.441237  | 0.15  | 0.883 | -9.868769 | 11.46869 |
| Dist. of Columbia2014 | .8535297  | 4.984089  | 0.17  | 0.864 | -8.918862 | 10.62592 |
| Dist. of Columbia2015 | -.9834726 | 4.866771  | -0.20 | 0.840 | -10.52584 | 8.55889  |
| Dist. of Columbia2016 | -.5366227 | 5.396254  | -0.10 | 0.921 | -11.11715 | 10.04391 |
| Dist. of Columbia2017 | .5159655  | 3.481434  | 0.15  | 0.882 | -6.310143 | 7.342074 |
| Dist. of Columbia2018 | 0         | (omitted) |       |       |           |          |
| Florida2009           | -4.349978 | 9.022869  | -0.48 | 0.630 | -22.04128 | 13.34132 |
| Florida2010           | -2.600832 | 8.54904   | -0.30 | 0.761 | -19.36308 | 14.16142 |
| Florida2011           | 2.461241  | 7.414194  | 0.33  | 0.740 | -12.0759  | 16.99838 |
| Florida2012           | -3.623616 | 6.344432  | -0.57 | 0.568 | -16.06326 | 8.816024 |
| Florida2013           | -5.533455 | 5.835347  | -0.95 | 0.343 | -16.97492 | 5.908013 |
| Florida2014           | -9.653955 | 5.342784  | -1.81 | 0.071 | -20.12965 | .8217345 |
| Florida2015           | -4.924808 | 5.208322  | -0.95 | 0.344 | -15.13686 | 5.287242 |
| Florida2016           | -5.086636 | 5.584828  | -0.91 | 0.362 | -16.03691 | 5.863635 |
| Florida2017           | -1.500357 | 3.651295  | -0.41 | 0.681 | -8.659515 | 5.6588   |
| Florida2018           | 0         | (omitted) |       |       |           |          |
| Georgia2009           | 12.16855  | 9.184186  | 1.32  | 0.185 | -5.83905  | 30.17614 |

|              |           |           |       |       |           |          |
|--------------|-----------|-----------|-------|-------|-----------|----------|
| Georgia2010  | 8.595356  | 8.529907  | 1.01  | 0.314 | -8.129383 | 25.32009 |
| Georgia2011  | 10.0062   | 7.52908   | 1.33  | 0.184 | -4.756197 | 24.7686  |
| Georgia2012  | -.515157  | 6.397286  | -0.08 | 0.936 | -13.05843 | 12.02811 |
| Georgia2013  | -.9935623 | 5.898729  | -0.17 | 0.866 | -12.5593  | 10.57218 |
| Georgia2014  | -6.256339 | 5.696766  | -1.10 | 0.272 | -17.42609 | 4.91341  |
| Georgia2015  | .0945493  | 5.754836  | 0.02  | 0.987 | -11.18906 | 11.37816 |
| Georgia2016  | -2.851961 | 5.877185  | -0.49 | 0.628 | -14.37546 | 8.671539 |
| Georgia2017  | .4203092  | 3.872525  | 0.11  | 0.914 | -7.172618 | 8.013237 |
| Georgia2018  | 0         | (omitted) |       |       |           |          |
| Hawaii2009   | 9.731318  | 11.16657  | 0.87  | 0.384 | -12.16316 | 31.6258  |
| Hawaii2010   | 2.701116  | 9.914147  | 0.27  | 0.785 | -16.73773 | 22.13996 |
| Hawaii2011   | 7.336128  | 9.648003  | 0.76  | 0.447 | -11.58088 | 26.25314 |
| Hawaii2012   | 1.565291  | 7.892363  | 0.20  | 0.843 | -13.9094  | 17.03999 |
| Hawaii2013   | 10.88468  | 8.811225  | 1.24  | 0.217 | -6.391646 | 28.161   |
| Hawaii2014   | 4.8711    | 7.451482  | 0.65  | 0.513 | -9.739152 | 19.48135 |
| Hawaii2015   | 9.146609  | 6.414912  | 1.43  | 0.154 | -3.431222 | 21.72444 |
| Hawaii2016   | -.9587962 | 5.533673  | -0.17 | 0.862 | -11.80877 | 9.891175 |
| Hawaii2017   | 3.006836  | 4.364087  | 0.69  | 0.491 | -5.549907 | 11.56358 |
| Hawaii2018   | 0         | (omitted) |       |       |           |          |
| Idaho2009    | -6.88738  | 10.26277  | -0.67 | 0.502 | -27.00978 | 13.23502 |
| Idaho2010    | -3.278132 | 9.781792  | -0.34 | 0.738 | -22.45746 | 15.9012  |
| Idaho2011    | 6.268972  | 8.867739  | 0.71  | 0.480 | -11.11816 | 23.6561  |
| Idaho2012    | 5.673157  | 7.923792  | 0.72  | 0.474 | -9.863161 | 21.20947 |
| Idaho2013    | -.298971  | 7.376224  | -0.04 | 0.968 | -14.76166 | 14.16372 |
| Idaho2014    | -4.957351 | 7.020338  | -0.71 | 0.480 | -18.72225 | 8.807551 |
| Idaho2015    | -.5080262 | 6.500638  | -0.08 | 0.938 | -13.25394 | 12.23789 |
| Idaho2016    | -3.406789 | 6.813995  | -0.50 | 0.617 | -16.76711 | 9.953532 |
| Idaho2017    | -2.312654 | 4.85723   | -0.48 | 0.634 | -11.83631 | 7.211003 |
| Idaho2018    | 0         | (omitted) |       |       |           |          |
| Illinois2009 | 1.023479  | 8.842592  | 0.12  | 0.908 | -16.31435 | 18.3613  |
| Illinois2010 | 1.104646  | 8.329108  | 0.13  | 0.894 | -15.22638 | 17.43567 |
| Illinois2011 | 5.433236  | 7.40318   | 0.73  | 0.463 | -9.082311 | 19.94878 |
| Illinois2012 | .2813645  | 6.370649  | 0.04  | 0.965 | -12.20968 | 12.77241 |
| Illinois2013 | 2.264581  | 5.787768  | 0.39  | 0.696 | -9.083597 | 13.61276 |
| Illinois2014 | -5.326989 | 5.412402  | -0.98 | 0.325 | -15.93918 | 5.285204 |
| Illinois2015 | .3862167  | 5.24543   | 0.07  | 0.941 | -9.89859  | 10.67102 |
| Illinois2016 | -4.003758 | 5.657161  | -0.71 | 0.479 | -15.09585 | 7.088337 |
| Illinois2017 | 1.97882   | 3.690469  | 0.54  | 0.592 | -5.257148 | 9.214789 |
| Illinois2018 | 0         | (omitted) |       |       |           |          |
| Indiana2009  | -.4604968 | 9.103303  | -0.05 | 0.960 | -18.3095  | 17.38851 |
| Indiana2010  | 1.860027  | 8.813483  | 0.21  | 0.833 | -15.42073 | 19.14078 |
| Indiana2011  | 8.506104  | 7.803967  | 1.09  | 0.276 | -6.795271 | 23.80748 |
| Indiana2012  | 7.327311  | 6.662518  | 1.10  | 0.272 | -5.736005 | 20.39063 |
| Indiana2013  | 9.165019  | 5.942054  | 1.54  | 0.123 | -2.485671 | 20.81571 |
| Indiana2014  | 4.302048  | 5.587351  | 0.77  | 0.441 | -6.65317  | 15.25727 |
| Indiana2015  | 4.010971  | 5.365207  | 0.75  | 0.455 | -6.508684 | 14.53063 |
| Indiana2016  | -1.18537  | 5.81497   | -0.20 | 0.838 | -12.58688 | 10.21614 |
| Indiana2017  | .9292654  | 3.785504  | 0.25  | 0.806 | -6.493038 | 8.351569 |
| Indiana2018  | 0         | (omitted) |       |       |           |          |
| Iowa2009     | -2.497915 | 9.113122  | -0.27 | 0.784 | -20.36617 | 15.37034 |
| Iowa2010     | .4772894  | 8.512174  | 0.06  | 0.955 | -16.21268 | 17.16726 |
| Iowa2011     | 4.912702  | 7.60105   | 0.65  | 0.518 | -9.990811 | 19.81621 |
| Iowa2012     | .8261764  | 6.482794  | 0.13  | 0.899 | -11.88475 | 13.53711 |
| Iowa2013     | .9767643  | 6.040522  | 0.16  | 0.872 | -10.86699 | 12.82052 |
| Iowa2014     | -8.147533 | 5.666581  | -1.44 | 0.151 | -19.2581  | 2.963031 |
| Iowa2015     | -5.981064 | 5.489709  | -1.09 | 0.276 | -16.74483 | 4.782706 |
| Iowa2016     | -9.513474 | 5.802509  | -1.64 | 0.101 | -20.89056 | 1.863608 |
| Iowa2017     | -1.655074 | 3.754834  | -0.44 | 0.659 | -9.017244 | 5.707095 |
| Iowa2018     | 0         | (omitted) |       |       |           |          |
| Kansas2009   | -3.385466 | 9.855834  | -0.34 | 0.731 | -22.70997 | 15.93904 |
| Kansas2010   | -5.317499 | 9.343489  | -0.57 | 0.569 | -23.63744 | 13.00244 |
| Kansas2011   | -.8694794 | 8.662193  | -0.10 | 0.920 | -17.85359 | 16.11464 |
| Kansas2012   | -3.587494 | 7.722268  | -0.46 | 0.642 | -18.72949 | 11.5545  |
| Kansas2013   | -3.15797  | 7.258706  | -0.44 | 0.664 | -17.39024 | 11.0743  |
| Kansas2014   | -9.156572 | 7.024201  | -1.30 | 0.192 | -22.92905 | 4.615904 |
| Kansas2015   | -2.393712 | 6.641993  | -0.36 | 0.719 | -15.41678 | 10.62936 |
| Kansas2016   | -5.215333 | 6.554049  | -0.80 | 0.426 | -18.06597 | 7.635305 |
| Kansas2017   | .6489666  | 4.482674  | 0.14  | 0.885 | -8.140291 | 9.438224 |
| Kansas2018   | 0         | (omitted) |       |       |           |          |
| Kentucky2009 | 3.949222  | 9.39059   | 0.42  | 0.674 | -14.46307 | 22.36152 |
| Kentucky2010 | 5.115637  | 8.857278  | 0.58  | 0.564 | -12.25098 | 22.48226 |
| Kentucky2011 | 9.918302  | 7.980196  | 1.24  | 0.214 | -5.728608 | 25.56521 |
| Kentucky2012 | 9.412676  | 6.965757  | 1.35  | 0.177 | -4.245206 | 23.07056 |
| Kentucky2013 | 10.65406  | 6.504477  | 1.64  | 0.102 | -2.099383 | 23.4075  |
| Kentucky2014 | 4.846278  | 6.023746  | 0.80  | 0.421 | -6.964587 | 16.65714 |
| Kentucky2015 | 3.169982  | 5.911602  | 0.54  | 0.592 | -8.421    | 14.76096 |

|                   |            |           |       |       |           |          |
|-------------------|------------|-----------|-------|-------|-----------|----------|
| Kentucky2016      | - .2078793 | 5.968627  | -0.03 | 0.972 | -11.91067 | 11.49491 |
| Kentucky2017      | .1860465   | 4.001327  | 0.05  | 0.963 | -7.659425 | 8.031518 |
| Kentucky2018      | 0          | (omitted) |       |       |           |          |
| Louisiana2009     | 2.693094   | 10.73323  | 0.25  | 0.802 | -18.35173 | 23.73792 |
| Louisiana2010     | 7.564343   | 9.75112   | 0.78  | 0.438 | -11.55485 | 26.68353 |
| Louisiana2011     | 10.76051   | 8.441767  | 1.27  | 0.203 | -5.791415 | 27.31243 |
| Louisiana2012     | 1.523773   | 7.3277    | 0.21  | 0.835 | -12.84378 | 15.89132 |
| Louisiana2013     | 4.42142    | 6.731975  | 0.66  | 0.511 | -8.778081 | 17.62092 |
| Louisiana2014     | 2.825629   | 6.066933  | 0.47  | 0.641 | -9.069913 | 14.72117 |
| Louisiana2015     | 6.666662   | 5.74465   | 1.16  | 0.246 | -4.596975 | 17.9303  |
| Louisiana2016     | -.0290903  | 6.056274  | -0.00 | 0.996 | -11.90373 | 11.84555 |
| Louisiana2017     | -.3816163  | 3.907894  | -0.10 | 0.922 | -8.043894 | 7.280661 |
| Louisiana2018     | 0          | (omitted) |       |       |           |          |
| Maine2009         | -5.537326  | 9.733877  | -0.57 | 0.569 | -24.62271 | 13.54806 |
| Maine2010         | -9.003148  | 9.029999  | -1.00 | 0.319 | -26.70843 | 8.70213  |
| Maine2011         | -3.927896  | 8.13395   | -0.48 | 0.629 | -19.87628 | 12.02048 |
| Maine2012         | -10.00108  | 7.106166  | -1.41 | 0.159 | -23.93426 | 3.932105 |
| Maine2013         | -5.185788  | 6.748025  | -0.77 | 0.442 | -18.41676 | 8.045183 |
| Maine2014         | -9.671357  | 6.541926  | -1.48 | 0.139 | -22.49823 | 3.155512 |
| Maine2015         | -1.038317  | 6.448973  | -0.16 | 0.872 | -13.68293 | 11.6063  |
| Maine2016         | -2.449759  | 6.557604  | -0.37 | 0.709 | -15.30737 | 10.40785 |
| Maine2017         | 2.259003   | 4.020254  | 0.56  | 0.574 | -5.623578 | 10.14159 |
| Maine2018         | 0          | (omitted) |       |       |           |          |
| Maryland2009      | 5.635247   | 9.897904  | 0.57  | 0.569 | -13.77175 | 25.04224 |
| Maryland2010      | -1.375699  | 9.451981  | -0.15 | 0.884 | -19.90836 | 17.15697 |
| Maryland2011      | 2.133863   | 8.392644  | 0.25  | 0.799 | -14.32174 | 18.58947 |
| Maryland2012      | -3.984457  | 7.328664  | -0.54 | 0.587 | -18.3539  | 10.38498 |
| Maryland2013      | -1.029784  | 6.510229  | -0.16 | 0.874 | -13.7945  | 11.73494 |
| Maryland2014      | -4.777422  | 6.330209  | -0.75 | 0.450 | -17.18917 | 7.634331 |
| Maryland2015      | -1.17909   | 6.147503  | -0.19 | 0.848 | -13.23261 | 10.87443 |
| Maryland2016      | -5.377323  | 5.925246  | -0.91 | 0.364 | -16.99506 | 6.24041  |
| Maryland2017      | -.5890337  | 3.840957  | -0.15 | 0.878 | -8.120065 | 6.941998 |
| Maryland2018      | 0          | (omitted) |       |       |           |          |
| Massachusetts2009 | 11.15156   | 8.981101  | 1.24  | 0.214 | -6.45784  | 28.76097 |
| Massachusetts2010 | 8.650349   | 8.465917  | 1.02  | 0.307 | -7.948923 | 25.24962 |
| Massachusetts2011 | 10.63834   | 7.758531  | 1.37  | 0.170 | -4.573952 | 25.85062 |
| Massachusetts2012 | 2.854473   | 6.749625  | 0.42  | 0.672 | -10.37964 | 16.08858 |
| Massachusetts2013 | 3.398903   | 6.753287  | 0.50  | 0.615 | -9.842386 | 16.64019 |
| Massachusetts2014 | -3.06643   | 6.557614  | -0.47 | 0.640 | -15.92406 | 9.791199 |
| Massachusetts2015 | 3.277216   | 5.888094  | 0.56  | 0.578 | -8.267674 | 14.82211 |
| Massachusetts2016 | -.5229841  | 5.653268  | -0.09 | 0.926 | -11.60745 | 10.56148 |
| Massachusetts2017 | .9325882   | 3.58842   | 0.26  | 0.795 | -6.10329  | 7.968466 |
| Massachusetts2018 | 0          | (omitted) |       |       |           |          |
| Michigan2009      | -1.498383  | 8.918086  | -0.17 | 0.867 | -18.98423 | 15.98746 |
| Michigan2010      | -1.813042  | 8.487217  | -0.21 | 0.831 | -18.45408 | 14.82799 |
| Michigan2011      | 1.297713   | 7.468305  | 0.17  | 0.862 | -13.34553 | 15.94095 |
| Michigan2012      | -3.861573  | 6.284795  | -0.61 | 0.539 | -16.18428 | 8.461136 |
| Michigan2013      | .1819672   | 5.717744  | 0.03  | 0.975 | -11.02891 | 11.39285 |
| Michigan2014      | -2.892834  | 5.4559    | -0.53 | 0.596 | -13.59031 | 7.804645 |
| Michigan2015      | 2.71686    | 5.365775  | 0.51  | 0.613 | -7.803909 | 13.23763 |
| Michigan2016      | -1.349649  | 5.705287  | -0.24 | 0.813 | -12.53611 | 9.836809 |
| Michigan2017      | 1.593801   | 3.71541   | 0.43  | 0.668 | -5.691069 | 8.87867  |
| Michigan2018      | 0          | (omitted) |       |       |           |          |
| Minnesota2009     | -10.97842  | 8.912528  | -1.23 | 0.218 | -28.45337 | 6.496528 |
| Minnesota2010     | -9.023267  | 8.504121  | -1.06 | 0.289 | -25.69745 | 7.650913 |
| Minnesota2011     | -2.224425  | 7.599284  | -0.29 | 0.770 | -17.12447 | 12.67563 |
| Minnesota2012     | -4.028003  | 6.408975  | -0.63 | 0.530 | -16.59419 | 8.538186 |
| Minnesota2013     | -1.906767  | 5.797651  | -0.33 | 0.742 | -13.27432 | 9.460791 |
| Minnesota2014     | -5.972045  | 5.618693  | -1.06 | 0.288 | -16.98872 | 5.044626 |
| Minnesota2015     | -3.523424  | 5.639282  | -0.62 | 0.532 | -14.58046 | 7.533616 |
| Minnesota2016     | -7.086553  | 5.789569  | -1.22 | 0.221 | -18.43826 | 4.265157 |
| Minnesota2017     | -1.96621   | 3.669194  | -0.54 | 0.592 | -9.160463 | 5.228044 |
| Minnesota2018     | 0          | (omitted) |       |       |           |          |
| Mississippi2009   | 15.46612   | 10.01199  | 1.54  | 0.123 | -4.164567 | 35.09682 |
| Mississippi2010   | 13.21431   | 9.530636  | 1.39  | 0.166 | -5.472578 | 31.90119 |
| Mississippi2011   | 13.48408   | 8.555667  | 1.58  | 0.115 | -3.291166 | 30.25933 |
| Mississippi2012   | 5.739825   | 7.282985  | 0.79  | 0.431 | -8.540052 | 20.0197  |
| Mississippi2013   | 4.991243   | 6.693202  | 0.75  | 0.456 | -8.132237 | 18.11472 |
| Mississippi2014   | -2.669603  | 6.392096  | -0.42 | 0.676 | -15.2027  | 9.863492 |
| Mississippi2015   | 3.831993   | 6.177724  | 0.62  | 0.535 | -8.280779 | 15.94477 |
| Mississippi2016   | -1.234355  | 6.065817  | -0.20 | 0.839 | -13.12771 | 10.659   |
| Mississippi2017   | 3.673101   | 4.091893  | 0.90  | 0.369 | -4.349946 | 11.69615 |
| Mississippi2018   | 0          | (omitted) |       |       |           |          |
| Missouri2009      | 6.555014   | 9.243865  | 0.71  | 0.478 | -11.5696  | 24.67962 |
| Missouri2010      | 3.519478   | 8.747401  | 0.40  | 0.687 | -13.63171 | 20.67066 |
| Missouri2011      | 3.862353   | 7.802978  | 0.49  | 0.621 | -11.43708 | 19.16179 |

|                   |           |           |       |       |           |            |
|-------------------|-----------|-----------|-------|-------|-----------|------------|
| Missouri2012      | -.8033634 | 6.661735  | -0.12 | 0.904 | -13.86515 | 12.25842   |
| Missouri2013      | 3.632314  | 6.028218  | 0.60  | 0.547 | -8.187319 | 15.45195   |
| Missouri2014      | 1.519256  | 5.598512  | 0.27  | 0.786 | -9.457846 | 12.49636   |
| Missouri2015      | 6.810911  | 5.531999  | 1.23  | 0.218 | -4.035777 | 17.6576    |
| Missouri2016      | 2.215616  | 5.763808  | 0.38  | 0.701 | -9.085584 | 13.51682   |
| Missouri2017      | 3.102803  | 3.760243  | 0.83  | 0.409 | -4.269971 | 10.47558   |
| Missouri2018      | 0         | (omitted) |       |       |           |            |
| Montana2009       | -8.780518 | 9.914126  | -0.89 | 0.376 | -28.21932 | 10.65828   |
| Montana2010       | -6.613796 | 9.921887  | -0.67 | 0.505 | -26.06781 | 12.84022   |
| Montana2011       | -4.408592 | 9.307462  | -0.47 | 0.636 | -22.6579  | 13.84071   |
| Montana2012       | -2.977899 | 7.837534  | -0.38 | 0.704 | -18.34509 | 12.38929   |
| Montana2013       | 3.654682  | 8.308556  | 0.44  | 0.660 | -12.63605 | 19.94541   |
| Montana2014       | -.6359128 | 8.082488  | -0.08 | 0.937 | -16.48339 | 15.21156   |
| Montana2015       | 1.263239  | 8.420268  | 0.15  | 0.881 | -15.24653 | 17.77301   |
| Montana2016       | -4.659044 | 7.554013  | -0.62 | 0.537 | -19.47033 | 10.15224   |
| Montana2017       | -5.030335 | 4.801562  | -1.05 | 0.295 | -14.44484 | 4.384173   |
| Montana2018       | 0         | (omitted) |       |       |           |            |
| Nebraska2009      | -5.721438 | 10.00571  | -0.57 | 0.567 | -25.33981 | 13.89693   |
| Nebraska2010      | -8.219936 | 9.488969  | -0.87 | 0.386 | -26.82513 | 10.38525   |
| Nebraska2011      | -4.640977 | 8.977293  | -0.52 | 0.605 | -22.24291 | 12.96096   |
| Nebraska2012      | -7.909811 | 7.867183  | -1.01 | 0.315 | -23.33514 | 7.515515   |
| Nebraska2013      | -6.576083 | 7.13862   | -0.92 | 0.357 | -20.5729  | 7.420735   |
| Nebraska2014      | -12.84799 | 6.706882  | -1.92 | 0.056 | -25.9983  | 3.023091   |
| Nebraska2015      | -3.977291 | 6.778693  | -0.59 | 0.557 | -17.26839 | 9.313811   |
| Nebraska2016      | -4.716714 | 6.750276  | -0.70 | 0.485 | -17.9521  | 8.518671   |
| Nebraska2017      | 4.114824  | 4.280229  | 0.96  | 0.336 | -4.277496 | 12.50714   |
| Nebraska2018      | 0         | (omitted) |       |       |           |            |
| Nevada2009        | 11.24802  | 14.0169   | 0.80  | 0.422 | -16.23517 | 38.73121   |
| Nevada2010        | 11.34787  | 12.98137  | 0.87  | 0.382 | -14.10494 | 36.80067   |
| Nevada2011        | 19.96976  | 14.13061  | 1.41  | 0.158 | -7.736378 | 47.6759    |
| Nevada2012        | 15.03797  | 10.07813  | 1.49  | 0.136 | -4.722397 | 34.79833   |
| Nevada2013        | 18.75167  | 11.20668  | 1.67  | 0.094 | -3.221467 | 40.7248    |
| Nevada2014        | -.2412964 | 11.18474  | -0.02 | 0.983 | -22.17141 | 21.68881   |
| Nevada2015        | 11.1099   | 11.46797  | 0.97  | 0.333 | -11.37554 | 33.59535   |
| Nevada2016        | 5.746187  | 9.696619  | 0.59  | 0.553 | -13.26614 | 24.75852   |
| Nevada2017        | 3.128     | 7.692743  | 0.41  | 0.684 | -11.9553  | 18.2113    |
| Nevada2018        | 0         | (omitted) |       |       |           |            |
| New Hampshire2009 | -7.019052 | 9.251135  | -0.76 | 0.448 | -25.15791 | 11.11981   |
| New Hampshire2010 | -8.455439 | 8.508962  | -0.99 | 0.320 | -25.13911 | 8.228233   |
| New Hampshire2011 | -3.026604 | 7.93168   | -0.38 | 0.703 | -18.57839 | 12.52518   |
| New Hampshire2012 | -7.557946 | 7.787439  | -0.97 | 0.332 | -22.82691 | 7.711022   |
| New Hampshire2013 | -6.290812 | 7.41152   | -0.85 | 0.396 | -20.82271 | 8.241085   |
| New Hampshire2014 | -13.2569  | 6.386896  | -2.08 | 0.038 | -25.7798  | -7.7340036 |
| New Hampshire2015 | -7.770908 | 6.137559  | -1.27 | 0.206 | -19.80493 | 4.263111   |
| New Hampshire2016 | -8.305161 | 5.561681  | -1.49 | 0.135 | -19.21005 | 2.599724   |
| New Hampshire2017 | -1.475447 | 3.944791  | -0.37 | 0.708 | -9.210068 | 6.259174   |
| New Hampshire2018 | 0         | (omitted) |       |       |           |            |
| New Jersey2009    | -.9285133 | 9.138797  | -0.10 | 0.919 | -18.84711 | 16.99009   |
| New Jersey2010    | .8398032  | 8.550506  | 0.10  | 0.922 | -15.92532 | 17.60493   |
| New Jersey2011    | 6.717504  | 7.699736  | 0.87  | 0.383 | -8.379503 | 21.81451   |
| New Jersey2012    | 6.745684  | 6.445019  | 1.05  | 0.295 | -5.891177 | 19.38255   |
| New Jersey2013    | 7.646878  | 5.755029  | 1.33  | 0.184 | -3.637108 | 18.93087   |
| New Jersey2014    | -.3086769 | 5.338104  | -0.06 | 0.954 | -10.77519 | 10.15784   |
| New Jersey2015    | .6379159  | 5.090353  | 0.13  | 0.900 | -9.342829 | 10.61866   |
| New Jersey2016    | -4.625994 | 5.478368  | -0.84 | 0.399 | -15.36753 | 6.11554    |
| New Jersey2017    | -.2812778 | 3.566565  | -0.08 | 0.937 | -7.274306 | 6.71175    |
| New Jersey2018    | 0         | (omitted) |       |       |           |            |
| New Mexico2009    | -15.67847 | 11.40244  | -1.38 | 0.169 | -38.03544 | 6.678495   |
| New Mexico2010    | -14.34006 | 10.58424  | -1.35 | 0.176 | -35.09277 | 6.412644   |
| New Mexico2011    | -8.896735 | 8.947864  | -0.99 | 0.320 | -26.44097 | 8.647499   |
| New Mexico2012    | -7.759682 | 8.368142  | -0.93 | 0.354 | -24.16725 | 8.647882   |
| New Mexico2013    | -.3872095 | 10.61037  | -0.04 | 0.971 | -21.19115 | 20.41673   |
| New Mexico2014    | -5.947979 | 11.17322  | -0.53 | 0.595 | -27.85551 | 15.95955   |
| New Mexico2015    | -9.833054 | 10.11187  | -0.97 | 0.331 | -29.65958 | 9.993469   |
| New Mexico2016    | -14.11866 | 8.071843  | -1.75 | 0.080 | -29.94526 | 1.707945   |
| New Mexico2017    | -6.920112 | 5.551117  | -1.25 | 0.213 | -17.80429 | 3.964062   |
| New Mexico2018    | 0         | (omitted) |       |       |           |            |
| New York2009      | 14.69268  | 8.888381  | 1.65  | 0.098 | -2.734929 | 32.12028   |
| New York2010      | 14.5434   | 8.252312  | 1.76  | 0.078 | -1.637052 | 30.72385   |
| New York2011      | 19.81107  | 7.276931  | 2.72  | 0.007 | 5.543064  | 34.07908   |
| New York2012      | 15.17127  | 6.054452  | 2.51  | 0.012 | 3.300197  | 27.04234   |
| New York2013      | 14.74473  | 5.46877   | 2.70  | 0.007 | 4.022013  | 25.46744   |
| New York2014      | 6.20899   | 5.165309  | 1.20  | 0.229 | -3.918723 | 16.3367    |
| New York2015      | 7.97049   | 5.082644  | 1.57  | 0.117 | -1.99514  | 17.93612   |
| New York2016      | .7694427  | 5.509248  | 0.14  | 0.889 | -10.03264 | 11.57152   |
| New York2017      | 2.601001  | 3.58511   | 0.73  | 0.468 | -4.428388 | 9.630389   |

|                    |           |           |       |       |           |           |  |
|--------------------|-----------|-----------|-------|-------|-----------|-----------|--|
| New York2018       | 0         | (omitted) |       |       |           |           |  |
| North Carolina2009 | 12.80043  | 9.081772  | 1.41  | 0.159 | -5.00636  | 30.60722  |  |
| North Carolina2010 | 11.22511  | 8.466171  | 1.33  | 0.185 | -5.374665 | 27.82488  |  |
| North Carolina2011 | 15.07524  | 7.56604   | 1.99  | 0.046 | .2403677  | 29.9101   |  |
| North Carolina2012 | 7.707019  | 6.378054  | 1.21  | 0.227 | -4.798543 | 20.21258  |  |
| North Carolina2013 | 6.091334  | 5.616236  | 1.08  | 0.278 | -4.920518 | 17.10319  |  |
| North Carolina2014 | -2.119078 | 5.091668  | -0.42 | 0.677 | -12.11024 | 7.864246  |  |
| North Carolina2015 | 1.868016  | 4.987868  | 0.37  | 0.708 | -7.911784 | 11.64782  |  |
| North Carolina2016 | -2.970643 | 5.481164  | -0.54 | 0.588 | -13.71766 | 7.776372  |  |
| North Carolina2017 | .9837101  | 3.601798  | 0.27  | 0.785 | -6.0784   | 8.04582   |  |
| North Carolina2018 | 0         | (omitted) |       |       |           |           |  |
| North Dakota2009   | -7.763835 | 10.18449  | -0.76 | 0.446 | -27.73274 | 12.20507  |  |
| North Dakota2010   | -6.698787 | 9.968509  | -0.67 | 0.502 | -26.24422 | 12.84664  |  |
| North Dakota2011   | -1.739637 | 10.34625  | -0.17 | 0.866 | -22.0257  | 18.54643  |  |
| North Dakota2012   | 3.702683  | 8.901781  | 0.42  | 0.677 | -13.7512  | 21.15656  |  |
| North Dakota2013   | 9.85563   | 8.086811  | 1.22  | 0.223 | -6.000323 | 25.71158  |  |
| North Dakota2014   | 10.47034  | 7.930714  | 1.32  | 0.187 | -5.079546 | 26.02023  |  |
| North Dakota2015   | 3.993207  | 7.917766  | 0.50  | 0.614 | -11.53129 | 19.51771  |  |
| North Dakota2016   | -2.452901 | 7.872153  | -0.31 | 0.755 | -17.88797 | 12.98217  |  |
| North Dakota2017   | -2.469072 | 4.981049  | -0.50 | 0.620 | -12.2355  | 7.297359  |  |
| North Dakota2018   | 0         | (omitted) |       |       |           |           |  |
| Ohio2009           | -9.726879 | 8.763123  | -1.11 | 0.267 | -26.90889 | 7.455131  |  |
| Ohio2010           | -8.0148   | 8.217978  | -0.98 | 0.329 | -24.12793 | 8.098335  |  |
| Ohio2011           | -1.409219 | 7.33106   | -0.19 | 0.848 | -15.78336 | 12.96492  |  |
| Ohio2012           | -1.775115 | 6.252835  | -0.28 | 0.777 | -14.03516 | 10.48493  |  |
| Ohio2013           | .2420724  | 5.698955  | 0.04  | 0.966 | -10.93197 | 11.41611  |  |
| Ohio2014           | -6.2054   | 5.281058  | -1.18 | 0.240 | -16.56006 | 4.149263  |  |
| Ohio2015           | -2.359283 | 5.077234  | -0.46 | 0.642 | -12.31431 | 7.595739  |  |
| Ohio2016           | -6.349675 | 5.578914  | -1.14 | 0.255 | -17.28835 | 4.589     |  |
| Ohio2017           | -1.339602 | 3.635052  | -0.37 | 0.713 | -8.466912 | 5.787709  |  |
| Ohio2018           | 0         | (omitted) |       |       |           |           |  |
| Oklahoma2009       | 10.20795  | 10.32005  | 0.99  | 0.323 | -10.02675 | 30.44266  |  |
| Oklahoma2010       | 5.401228  | 9.532174  | 0.57  | 0.571 | -13.28867 | 24.09113  |  |
| Oklahoma2011       | 3.424851  | 8.739575  | 0.39  | 0.695 | -13.71099 | 20.56069  |  |
| Oklahoma2012       | -5.099371 | 7.444709  | -0.68 | 0.493 | -19.69634 | 9.4976    |  |
| Oklahoma2013       | -4.22231  | 7.083687  | -0.60 | 0.551 | -18.11142 | 9.6668    |  |
| Oklahoma2014       | -7.401103 | 6.488037  | -1.14 | 0.254 | -20.12231 | 5.320105  |  |
| Oklahoma2015       | 2.242917  | 6.320281  | 0.35  | 0.723 | -10.14937 | 14.6352   |  |
| Oklahoma2016       | .6520167  | 6.266191  | 0.10  | 0.917 | -11.63421 | 12.93825  |  |
| Oklahoma2017       | 5.465409  | 4.104672  | 1.33  | 0.183 | -2.582694 | 13.51351  |  |
| Oklahoma2018       | 0         | (omitted) |       |       |           |           |  |
| Oregon2009         | -9.031016 | 9.268096  | -0.97 | 0.330 | -27.20314 | 9.141103  |  |
| Oregon2010         | -9.841953 | 8.713896  | -1.13 | 0.259 | -26.92744 | 7.243537  |  |
| Oregon2011         | -3.278269 | 7.811194  | -0.42 | 0.675 | -18.59382 | 12.03728  |  |
| Oregon2012         | -11.17076 | 6.844941  | -1.63 | 0.103 | -24.59176 | 2.250236  |  |
| Oregon2013         | -8.792438 | 6.119981  | -1.44 | 0.151 | -20.79199 | 3.207117  |  |
| Oregon2014         | -14.93881 | 5.843123  | -2.56 | 0.011 | -26.39553 | -3.482096 |  |
| Oregon2015         | -7.613469 | 5.532649  | -1.38 | 0.169 | -18.46143 | 3.234493  |  |
| Oregon2016         | -8.166538 | 5.824278  | -1.40 | 0.161 | -19.5863  | 3.253226  |  |
| Oregon2017         | -2.31836  | 3.964122  | -0.58 | 0.559 | -10.09088 | 5.454164  |  |
| Oregon2018         | 0         | (omitted) |       |       |           |           |  |
| Pennsylvania2009   | 5.523637  | 8.76098   | 0.63  | 0.528 | -11.65417 | 22.70144  |  |
| Pennsylvania2010   | 5.351401  | 8.15512   | 0.66  | 0.512 | -10.63849 | 21.34129  |  |
| Pennsylvania2011   | 10.98681  | 7.263164  | 1.51  | 0.130 | -3.254207 | 25.22782  |  |
| Pennsylvania2012   | 3.870142  | 6.189     | 0.63  | 0.532 | -8.26474  | 16.00502  |  |
| Pennsylvania2013   | 6.073     | 5.628507  | 1.08  | 0.281 | -4.962913 | 17.10891  |  |
| Pennsylvania2014   | -3.706703 | 5.219379  | -0.71 | 0.478 | -13.94043 | 6.527025  |  |
| Pennsylvania2015   | 1.081453  | 5.023882  | 0.22  | 0.830 | -8.76896  | 10.93187  |  |
| Pennsylvania2016   | -4.393502 | 5.541181  | -0.79 | 0.428 | -15.25819 | 6.471188  |  |
| Pennsylvania2017   | .9313218  | 3.508385  | 0.27  | 0.791 | -5.947631 | 7.810275  |  |
| Pennsylvania2018   | 0         | (omitted) |       |       |           |           |  |
| Puerto Rico2009    | 24.72783  | 9.473785  | 2.61  | 0.009 | 6.152413  | 43.30325  |  |
| Puerto Rico2010    | 22.24746  | 8.765308  | 2.54  | 0.011 | 5.061171  | 39.43376  |  |
| Puerto Rico2011    | 32.54623  | 7.862313  | 4.14  | 0.000 | 17.13046  | 47.96201  |  |
| Puerto Rico2012    | 23.35487  | 6.84221   | 3.41  | 0.001 | 9.939224  | 36.77051  |  |
| Puerto Rico2013    | 18.05635  | 6.089809  | 2.97  | 0.003 | 6.115955  | 29.99675  |  |
| Puerto Rico2014    | 4.260091  | 5.716368  | 0.75  | 0.456 | -6.948093 | 15.46828  |  |
| Puerto Rico2015    | 6.441902  | 5.398142  | 1.19  | 0.233 | -4.142331 | 17.02613  |  |
| Puerto Rico2016    | 1.176917  | 5.684959  | 0.21  | 0.836 | -9.969682 | 12.32352  |  |
| Puerto Rico2017    | 2.871668  | 3.680749  | 0.78  | 0.435 | -4.345241 | 10.08858  |  |
| Puerto Rico2018    | 0         | (omitted) |       |       |           |           |  |
| Rhode Island2009   | 19.45147  | 10.27129  | 1.89  | 0.058 | -.6876293 | 39.59056  |  |
| Rhode Island2010   | 10.01942  | 9.846508  | 1.02  | 0.309 | -9.2868   | 29.32564  |  |
| Rhode Island2011   | 10.56688  | 8.448836  | 1.25  | 0.211 | -5.9989   | 27.13266  |  |
| Rhode Island2012   | 6.026619  | 8.290584  | 0.73  | 0.467 | -10.22887 | 22.28211  |  |
| Rhode Island2013   | 7.65619   | 8.437892  | 0.91  | 0.364 | -8.888133 | 24.20051  |  |



|                    |           |           |       |       |           |          |
|--------------------|-----------|-----------|-------|-------|-----------|----------|
| Rhode Island2014   | .4987656  | 7.654616  | 0.07  | 0.948 | -14.50978 | 15.50731 |
| Rhode Island2015   | 4.462062  | 6.786439  | 0.66  | 0.511 | -8.844228 | 17.76835 |
| Rhode Island2016   | -3.382086 | 5.658312  | -0.60 | 0.550 | -14.47644 | 7.712266 |
| Rhode Island2017   | 1.174185  | 4.047101  | 0.29  | 0.772 | -6.761038 | 9.109408 |
| Rhode Island2018   | 0         | (omitted) |       |       |           |          |
| South Carolina2009 | 6.44428   | 9.49859   | 0.68  | 0.498 | -12.17977 | 25.06833 |
| South Carolina2010 | 6.719143  | 8.99439   | 0.75  | 0.455 | -10.91632 | 24.3546  |
| South Carolina2011 | 10.14888  | 7.938488  | 1.28  | 0.201 | -5.41625  | 25.71402 |
| South Carolina2012 | 5.099651  | 6.928647  | 0.74  | 0.462 | -8.485469 | 18.68477 |
| South Carolina2013 | 5.060615  | 6.327153  | 0.80  | 0.424 | -7.345145 | 17.46638 |
| South Carolina2014 | 2.257344  | 6.329391  | 0.36  | 0.721 | -10.1528  | 14.66749 |
| South Carolina2015 | 5.301692  | 6.233472  | 0.85  | 0.395 | -6.920385 | 17.52377 |
| South Carolina2016 | -.1264129 | 6.345214  | -0.02 | 0.984 | -12.56759 | 12.31476 |
| South Carolina2017 | -.5722874 | 4.110504  | -0.14 | 0.889 | -8.631826 | 7.487251 |
| South Carolina2018 | 0         | (omitted) |       |       |           |          |
| South Dakota2009   | -9.732665 | 10.73696  | -0.91 | 0.365 | -30.78482 | 11.31949 |
| South Dakota2010   | -9.615376 | 10.50819  | -0.92 | 0.360 | -30.21897 | 10.98822 |
| South Dakota2011   | 3.96606   | 9.399086  | 0.42  | 0.673 | -14.46289 | 22.39501 |
| South Dakota2012   | 1.433593  | 8.962161  | 0.16  | 0.873 | -16.13867 | 19.00586 |
| South Dakota2013   | 6.162056  | 7.899968  | 0.78  | 0.435 | -9.32755  | 21.65166 |
| South Dakota2014   | -1.312567 | 7.926918  | -0.17 | 0.868 | -16.85501 | 14.22988 |
| South Dakota2015   | -1.349997 | 7.78336   | -0.17 | 0.862 | -16.61097 | 13.91097 |
| South Dakota2016   | -2.589828 | 7.504064  | -0.35 | 0.730 | -17.30318 | 12.12352 |
| South Dakota2017   | -3.6917   | 5.243459  | -0.70 | 0.481 | -13.97264 | 6.589242 |
| South Dakota2018   | 0         | (omitted) |       |       |           |          |
| Tennessee2009      | -2.80075  | 9.448861  | -0.30 | 0.767 | -21.3273  | 15.7258  |
| Tennessee2010      | -.985187  | 8.836786  | -0.11 | 0.911 | -18.31163 | 16.34126 |
| Tennessee2011      | 3.400318  | 7.938803  | 0.43  | 0.668 | -12.16543 | 18.96607 |
| Tennessee2012      | -1.885823 | 6.586508  | -0.29 | 0.775 | -14.8001  | 11.02846 |
| Tennessee2013      | -2.885655 | 6.058519  | -0.48 | 0.634 | -14.7647  | 8.99339  |
| Tennessee2014      | -8.121661 | 5.667903  | -1.43 | 0.152 | -19.23482 | 2.991496 |
| Tennessee2015      | -.7707139 | 5.593207  | -0.14 | 0.890 | -11.73741 | 10.19598 |
| Tennessee2016      | -1.159801 | 5.872578  | -0.20 | 0.843 | -12.67427 | 10.35467 |
| Tennessee2017      | 1.587292  | 3.758789  | 0.42  | 0.673 | -5.782631 | 8.957215 |
| Tennessee2018      | 0         | (omitted) |       |       |           |          |
| Texas2009          | -1.099104 | 8.839657  | -0.12 | 0.901 | -18.43117 | 16.23297 |
| Texas2010          | -4.922518 | 8.312809  | -0.59 | 0.554 | -21.22159 | 11.37655 |
| Texas2011          | -.3681651 | 7.433797  | -0.05 | 0.961 | -14.94374 | 14.20741 |
| Texas2012          | -2.842526 | 6.239097  | -0.46 | 0.649 | -15.07563 | 9.390582 |
| Texas2013          | -.1279146 | 5.655204  | -0.02 | 0.982 | -11.21617 | 10.96034 |
| Texas2014          | -3.42676  | 5.313459  | -0.64 | 0.519 | -13.84495 | 6.991432 |
| Texas2015          | .4208738  | 5.254564  | 0.08  | 0.936 | -9.881842 | 10.72359 |
| Texas2016          | -3.948587 | 5.628589  | -0.70 | 0.483 | -14.98466 | 7.087486 |
| Texas2017          | 1.842724  | 3.701356  | 0.50  | 0.619 | -5.414589 | 9.100038 |
| Texas2018          | 0         | (omitted) |       |       |           |          |
| Utah2009           | -1.885964 | 12.45084  | -0.15 | 0.880 | -26.29854 | 22.52661 |
| Utah2010           | -9.538943 | 11.42759  | -0.83 | 0.404 | -31.94522 | 12.86733 |
| Utah2011           | -4.461769 | 9.234278  | -0.48 | 0.629 | -22.56758 | 13.64404 |
| Utah2012           | -3.240259 | 7.726887  | -0.42 | 0.675 | -18.3905  | 11.90998 |
| Utah2013           | .1658864  | 7.920129  | 0.02  | 0.983 | -15.36325 | 15.69502 |
| Utah2014           | -5.887811 | 8.716053  | -0.68 | 0.499 | -22.97753 | 11.20191 |
| Utah2015           | .7648804  | 9.31709   | 0.08  | 0.935 | -17.5033  | 19.03306 |
| Utah2016           | -4.022507 | 9.886655  | -0.41 | 0.684 | -23.40745 | 15.36243 |
| Utah2017           | .6750834  | 6.60741   | 0.10  | 0.919 | -12.28018 | 13.63035 |
| Utah2018           | 0         | (omitted) |       |       |           |          |
| Vermont2009        | -11.2764  | 12.76149  | -0.88 | 0.377 | -36.29809 | 13.74528 |
| Vermont2010        | -14.3395  | 10.02844  | -1.43 | 0.153 | -34.00245 | 5.32344  |
| Vermont2011        | -7.751937 | 9.194642  | -0.84 | 0.399 | -25.78003 | 10.27616 |
| Vermont2012        | -7.324913 | 6.805421  | -1.08 | 0.282 | -20.66842 | 6.018597 |
| Vermont2013        | -3.81994  | 7.802203  | -0.49 | 0.624 | -19.11786 | 11.47798 |
| Vermont2014        | -7.612274 | 6.721299  | -1.13 | 0.257 | -20.79084 | 5.566297 |
| Vermont2015        | -1.387396 | 7.666546  | -0.18 | 0.856 | -16.41933 | 13.64454 |
| Vermont2016        | -1.515054 | 6.345051  | -0.24 | 0.811 | -13.95591 | 10.9258  |
| Vermont2017        | 1.420131  | 3.834244  | 0.37  | 0.711 | -6.097738 | 8.938001 |
| Vermont2018        | 0         | (omitted) |       |       |           |          |
| Virginia2009       | 3.324263  | 9.250704  | 0.36  | 0.719 | -14.81375 | 21.46228 |
| Virginia2010       | 1.2715    | 8.708471  | 0.15  | 0.884 | -15.80335 | 18.34635 |
| Virginia2011       | 7.287354  | 7.997533  | 0.91  | 0.362 | -8.39355  | 22.96826 |
| Virginia2012       | 3.719319  | 6.895098  | 0.54  | 0.590 | -9.800021 | 17.23866 |
| Virginia2013       | 3.903523  | 6.492316  | 0.60  | 0.548 | -8.826075 | 16.63312 |
| Virginia2014       | -4.739113 | 5.883034  | -0.81 | 0.421 | -16.27408 | 6.795856 |
| Virginia2015       | -3.069062 | 5.472723  | -0.56 | 0.575 | -13.79953 | 7.661402 |
| Virginia2016       | -6.506851 | 5.665653  | -1.15 | 0.251 | -17.6156  | 4.601894 |
| Virginia2017       | -.4168372 | 3.820449  | -0.11 | 0.913 | -7.90766  | 7.073985 |
| Virginia2018       | 0         | (omitted) |       |       |           |          |
| Washington2009     | 6.415919  | 9.050509  | 0.71  | 0.478 | -11.32957 | 24.16141 |

|                   |           |                                   |       |       |           |          |
|-------------------|-----------|-----------------------------------|-------|-------|-----------|----------|
| Washington2010    | 3.990801  | 8.550776                          | 0.47  | 0.641 | -12.77486 | 20.75646 |
| Washington2011    | 8.88254   | 7.390527                          | 1.20  | 0.229 | -5.608197 | 23.37328 |
| Washington2012    | 4.603741  | 6.365127                          | 0.72  | 0.470 | -7.876475 | 17.08396 |
| Washington2013    | 5.24738   | 5.88858                           | 0.89  | 0.373 | -6.298463 | 16.79322 |
| Washington2014    | -2.673475 | 5.626803                          | -0.48 | 0.635 | -13.70605 | 8.359097 |
| Washington2015    | 1.491205  | 5.49762                           | 0.27  | 0.786 | -9.288077 | 12.27049 |
| Washington2016    | -3.875594 | 5.777247                          | -0.67 | 0.502 | -15.20314 | 7.451955 |
| Washington2017    | .8001055  | 3.852588                          | 0.21  | 0.835 | -6.753731 | 8.353942 |
| Washington2018    | 0         | (omitted)                         |       |       |           |          |
| West Virginia2009 | 17.57472  | 9.259992                          | 1.90  | 0.058 | -.5815095 | 35.73095 |
| West Virginia2010 | 16.30022  | 8.986097                          | 1.81  | 0.070 | -1.318975 | 33.91942 |
| West Virginia2011 | 20.13178  | 8.575042                          | 2.35  | 0.019 | 3.318542  | 36.94501 |
| West Virginia2012 | 17.00337  | 7.541272                          | 2.25  | 0.024 | 2.21706   | 31.78967 |
| West Virginia2013 | 13.10875  | 6.786474                          | 1.93  | 0.053 | -.197605  | 26.41511 |
| West Virginia2014 | 3.549511  | 6.22208                           | 0.57  | 0.568 | -8.650231 | 15.74925 |
| West Virginia2015 | 2.144579  | 6.018955                          | 0.36  | 0.722 | -9.656892 | 13.94605 |
| West Virginia2016 | -1.836323 | 6.109251                          | -0.30 | 0.764 | -13.81484 | 10.14219 |
| West Virginia2017 | .789758   | 4.003406                          | 0.20  | 0.844 | -7.059791 | 8.639307 |
| West Virginia2018 | 0         | (omitted)                         |       |       |           |          |
| Wisconsin2009     | -5.512709 | 8.853494                          | -0.62 | 0.534 | -22.87191 | 11.84649 |
| Wisconsin2010     | -2.153033 | 8.37845                           | -0.26 | 0.797 | -18.58081 | 14.27474 |
| Wisconsin2011     | 6.782095  | 7.483894                          | 0.91  | 0.365 | -7.891707 | 21.4559  |
| Wisconsin2012     | 4.098282  | 6.274984                          | 0.65  | 0.514 | -8.205189 | 16.40175 |
| Wisconsin2013     | 5.785796  | 5.837844                          | 0.99  | 0.322 | -5.660568 | 17.23216 |
| Wisconsin2014     | -.668148  | 5.373383                          | -0.12 | 0.901 | -11.20383 | 9.867539 |
| Wisconsin2015     | 4.299664  | 5.362412                          | 0.80  | 0.423 | -6.214511 | 14.81384 |
| Wisconsin2016     | -2.826194 | 5.707746                          | -0.50 | 0.621 | -14.01747 | 8.365084 |
| Wisconsin2017     | 1.121963  | 3.702761                          | 0.30  | 0.762 | -6.138105 | 8.38203  |
| Wisconsin2018     | 0         | (omitted)                         |       |       |           |          |
| Wyoming2009       | 0         | (omitted)                         |       |       |           |          |
| Wyoming2010       | 0         | (omitted)                         |       |       |           |          |
| Wyoming2011       | 0         | (omitted)                         |       |       |           |          |
| Wyoming2012       | 0         | (omitted)                         |       |       |           |          |
| Wyoming2013       | 0         | (omitted)                         |       |       |           |          |
| Wyoming2014       | 0         | (omitted)                         |       |       |           |          |
| Wyoming2015       | 0         | (omitted)                         |       |       |           |          |
| Wyoming2016       | 0         | (omitted)                         |       |       |           |          |
| Wyoming2017       | 0         | (omitted)                         |       |       |           |          |
| Wyoming2018       | 0         | (omitted)                         |       |       |           |          |
| _cons             | 313.2453  | 32.97281                          | 9.50  | 0.000 | 248.5949  | 377.8956 |
| sigma_u           | 52.761728 |                                   |       |       |           |          |
| sigma_e           | 21.882087 |                                   |       |       |           |          |
| rho               | .85323914 | (fraction of variance due to u_i) |       |       |           |          |

## TOTAL NUMBER OF MISSING OBSERVATIONS BY DEPENDENT VARIABLE

National reporting on death rates from NCHS data is conventionally based on reported data, with the counties (and states) with missing data, excluded from calculation of area-level averages. The US comprises a total of 56 states & territories, including 51 states (District of Columbia included) and 5 territories (American Samoa, Guam, Northern Mariana Islands, Puerto Rico, and US Virgin Islands). Data on CVD mortality rate amounted to a total of 31,017 observations and covered a total of 3,152 counties and 53 states & territories over the ten-year period. A total of 3 territories had no (zero) counties reporting data on CVD deaths over the entire ten-year period, including American Samoa, Northern Mariana Islands, and US Virgin Islands. Data on opioid use mortality rate amounted to a total of 3,273 observations and covered a total of 554 counties and 48 states & territories over the ten-year period. A total of 8 states & territories had no (zero) counties reporting data on opioid use deaths over the entire ten-year period, including 3 states (Montana, South Dakota, Wyoming) and 5 territories (American Samoa, Guam, Northern Mariana Islands, Puerto Rico, US Virgin Islands).

Although the difference between total county-level observations for CVD mortality and opioid use mortality (i.e., 31,017 vs. 3,273 observations respectively), may raise questions about the completeness of the opioid use mortality data, it would be relevant to note that the SDoH database draws upon the official national source of data on opioid mortality, i.e., the CDC, which in turn oversees the NCHS, i.e., the national center responsible for maintaining all individual death certificate data submitted by states. Importantly, our descriptive statistics on CVD and opioid use death rates (summarized in Figures 1-4), serve to confirm that our calculations related to national, regional, and state-level trends and averages for both CVD and opioid use death rates, are fully consistent with publicly reported statistics on CVD and opioid use death rates across all three area-levels of interest in the US (national, regional, and state), over the same time-period.

## METHOD FOR CALCULATING IMPACT OF SIGNIFICANT PREDICTORS ON SAMPLE MEAN MORTALITY RATES (TABLES 3 AND TABLE 5)

Turning to the primary findings for CVD death rate, based on the regression coefficient value for ACS\_PCT\_ARMED\_FORCES indicated in Table 2, Column 2 for county and year fixed-effects, a 1% increase in 'percentage of civilian population in armed forces,' significantly predicts an increase in CVD death rate by 1.63 per 100,000 ( $p < 0.01$ ). This also represents a 0.64% increase in the mean CVD death rate of 250.73 per 100,000 (in the sample), i.e.,  $(1.63/250.73) * 100$ . Another way of estimating impact of a change in ACS\_PCT\_ARMED\_FORCES on the mean CVD death rate, would be as follows:

- If a 1% increase in ACS\_PCT\_ARMED\_FORCES is significant in increasing CVD death rate by 1.63 per 100,000 and correspondingly, increasing the mean CVD death rate (in the sample), by **0.64%**, then what would the impact of a one standard deviation (SD) change in ACS\_PCT\_ARMED\_FORCES be, on the mean CVD death rate?
- Given SD of ACS\_PCT\_ARMED\_FORCES is 1.66, this question translates to: 'what would the impact of a 1.66% increase in 'percentage of civilian population in armed forces' be, on the mean CVD death rate?' The answer to this would be  $[(1.63 * 1.66) / 250.73] * 100$ , which translates to a **1.07%** increase in the mean CVD death rate.
- For practical purposes therefore,  $1.63 * 1.66$  (i.e., coefficient value \* SD), represents the effect size. In other words, the impact of significant SDoH predictors on mean CVD (or opioid use) death rates could be calculated based on both coefficient value and effect size.

This practical approach to calculating the impact of significant predictor variables on the dependent variable (sample mean) based on both coefficient value and effect size, has been leveraged in a vast number of health economic research studies that have utilized similar county-level panel datasets and fixed-effects regression techniques. For the purposes of this study, the aforementioned approach was used to calculate percent change in mean CVD death rate and mean opioid use death rate (in the sample), for all significant SDoH predictors in both specifications. Results are summarized in Table 3 and Table 5.
