# Supplementary material for: The relationship between Social Determinants of Health (SDoH) and death from cardiovascular disease or opioid use in counties across the United States (2009–2018)
Source: BMC Public Health. 2022 Feb 4;22:236. doi: 10.1186/s12889-022-12653-8 (PMC8817535; doi:10.1186/s12889-022-12653-8)
Supplement: Supplementary file 1 — Additional file 1. [file 12889_2022_12653_MOESM1_ESM.pdf]

# Appendix 1

## SDoH variables in AHRQ Dataset and Rationale for Exclusion/Inclusion

| Variable Label         | Variable description                                                       | Two Criteria for Exclusion              |                                  | Excluded or Included? |
|------------------------|----------------------------------------------------------------------------|-----------------------------------------|----------------------------------|-----------------------|
|                        |                                                                            | Problem with 10-year Data Availability? | Problem with Multi-Collinearity? |                       |
| Socio-economic context |                                                                            |                                         |                                  |                       |
| ACS_PCT_FEMALE         | Percentage of population that is female                                    | No                                      | No                               | Included              |
| ACS_MEDIAN_AGE         | Median Age                                                                 | No                                      | No                               | Included              |
| ACS_PCT_ASIAN          | Percentage of population reporting Asian race                              | No                                      | No                               | Included              |
| ACS_PCT_BLACK          | Percentage of population reporting Black race                              | No                                      | No                               | Included              |
| ACS_PCT_HISPAN         | Percentage of population reporting Hispanic ethnicity                      | No                                      | No                               | Included              |
| ACS_PCT_WHITE          | Percentage of population reporting White race                              | No                                      | No                               | Included              |
| ACS_PCT_BACHELOR_DGR   | Percentage of population with a bachelor's degree (ages 25 and over)       | No                                      | No                               | Included              |
| ACS_MEDIAN_HH_INCOME   | Median household income                                                    | No                                      | No                               | Included              |
| ACS_PCT_INC137         | Percentage of population with income to poverty ratio of 1.00–1.37         | Yes                                     | No                               | Excluded              |
| ACS_PCT_INC400         | Percentage of population with income to poverty ratio of 4.00 or higher    | Yes                                     | No                               | Excluded              |
| ACS_PCT_UNEMPLOY       | Percentage of population that was unemployed (ages 16 years and over)      | No                                      | No                               | Included              |
| ACS_PCT_CONSTRUCT      | Percentage of employed working in construction                             | Yes                                     | No                               | Excluded              |
| ACS_PCT_MANUFACT       | Percentage of employed working in manufacturing                            | Yes                                     | No                               | Excluded              |
| ACS_PCT_NATURE         | Percentage of employed working in agriculture, forestry, fishing and       | Yes                                     | No                               | Excluded              |
| ACS_PCT_PROFESS        | Percentage of employed working in professional, scientific, management,    | Yes                                     | No                               | Excluded              |
| ACS_PCT_GRP_QRT        | Percentage of persons in institutionalized (correctional) group            | No                                      | No                               | Included              |
| ACS_PCT_VA             | Percentage of the civilian population consisting of veterans (ages 18 and  | No                                      | No                               | Included              |
| ACS_PCT_ARMED_FORCES   | Percentage of civilian population in armed forces (ages 16 years and over) | No                                      | No                               | Included              |
| ACS_PCT_DISABLE        | Percentage of population with a disability                                 | Yes                                     | No                               | Excluded              |
| Healthcare Context     |                                                                            |                                         |                                  |                       |
| AHRF_HPSA_PRIM         | HPSA code—shortage of primary care physicians                              | Yes                                     | No                               | Excluded              |
| AHRF_HPSA_MENTAL       | HPSA code—shortage of mental healthcare providers                          | Yes                                     | No                               | Excluded              |
| AMFAR_AMATFAC          | Number of substance abuse treatment facilities with all three              | Yes                                     | No                               | Excluded              |

| Variable Label          | Variable description                                                        | Two Criteria for Exclusion              |                                  | Excluded or Included? |
|-------------------------|-----------------------------------------------------------------------------|-----------------------------------------|----------------------------------|-----------------------|
|                         |                                                                             | Problem with 10-year Data Availability? | Problem with Multi-Collinearity? |                       |
| AMFAR_HICVTFAC          | Number of substance abuse facilities offering both HIV test and hepatitis C | Yes                                     | No                               | Excluded              |
| AMFAR_HIVTFAC           | Number of substance abuse facilities offering HIV testing                   | Yes                                     | No                               | Excluded              |
| AMFAR_MHFAC             | Number of facilities that provide mental health services                    | Yes                                     | No                               | Excluded              |
| ACS_PCT_MEDICAID_ANY    | Percentage of population with any Medicaid/means-tested public health       | Yes                                     | No                               | Excluded              |
| ACS_PCT_MEDICARE_ONLY   | Percentage of population with Medicare only                                 | Yes                                     | No                               | Excluded              |
| ACS_PCT_PRIVATE_ANY     | Percentage of population with any private health insurance coverage         | Yes                                     | No                               | Excluded              |
| ACS_PCT_PRIVATE_EMPL    | Percentage of population with employer-based health insurance               | Yes                                     | No                               | Excluded              |
| ACS_PCT_PUBLIC_ONLY     | Percentage of population with Medicare, Medicaid,                           | Yes                                     | No                               | Excluded              |
| ACS_PCT_TRICARE_VA      | Percentage of population with TRICARE/military or VA health                 | Yes                                     | No                               | Excluded              |
| ACS_PCT_UNINSURED       | Percentage of population with no health insurance coverage                  | Yes                                     | No                               | Excluded              |
| AMFAR_OPIOIDRXRATE      | Number of opioid prescriptions per 100 persons                              | Yes                                     | No                               | Excluded              |
| CHR_ADULT_OBESITY       | Percentage of the adult population (age 20 and older) that is obese         | Yes                                     | No                               | Excluded              |
| CHR_EXCESS_DRINK        | Percentage of adults reporting binge or heavy drinking                      | Yes                                     | No                               | Excluded              |
| CHR_SMOKING             | Percentage of adults who are current smokers                                | Yes                                     | No                               | Excluded              |
| CHR_DIABETES_PREV       | Percentage of adults aged 20 and above with diagnosed diabetes              | Yes                                     | No                               | Excluded              |
| CHR_MENTAL_DISTRESS     | Percentage of adults reporting 14 or more days of poor mental health per    | Yes                                     | No                               | Excluded              |
| CHR_PHYSICAL_DISTRESS   | Percentage of adults reporting 14 or more days of poor physical health per  | Yes                                     | No                               | Excluded              |
| CHR_PHYS_INACTIVITY     | Percentage of adults age 20 and over reporting no leisure-time physical     | Yes                                     | No                               | Excluded              |
| CHR_TEEN_BIRTH          | Births per 1,000 females aged 15-19                                         | Yes                                     | No                               | Excluded              |
| CHR_SEGREG_BLACK        | Segregation Index (higher values indicate greater residential               | Yes                                     | No                               | Excluded              |
| CHR_SEGREG_NON_WHITE    | Segregation Index (higher values indicate greater residential               | Yes                                     | No                               | Excluded              |
| AHRF_ER_VST_ST_G_HOSP   | Number of emergency department visits in short-term general hospitals       | Yes                                     | No                               | Excluded              |
| AHRF_HOSP_AMMS          | Total number of hospital admissions                                         | Yes                                     | No                               | Excluded              |
| AHRF_ST_COMM_HOSP_ADMS  | Total number of short-term community hospital admissions                    | Yes                                     | No                               | Excluded              |
| AHRF_MCR_IP_DAY_ST_G    | Total Medicare inpatient days, short-term general hospitals                 | Yes                                     | No                               | Excluded              |
| AHRF_MD_CD_INP_DAY_STGH | Total Medicaid inpatient days, short-term general hospitals                 | Yes                                     | No                               | Excluded              |
| AHRF_IP_DAY_ST_G_HOSP   | Total number of inpatient days in short-term general hospitals              | Yes                                     | No                               | Excluded              |

| Variable Label                         | Variable description                                                  | Two Criteria for Exclusion              |                                  | Excluded or Included? |
|----------------------------------------|-----------------------------------------------------------------------|-----------------------------------------|----------------------------------|-----------------------|
|                                        |                                                                       | Problem with 10-year Data Availability? | Problem with Multi-Collinearity? |                       |
| AHRF_RATE_MCR_BN_READM                 | Medicare beneficiary hospital readmission rate, fee for service       | Yes                                     | No                               | Excluded              |
| AHRF_OP_VST_ST_G_ER_OP                 | Total number of outpatient visits in short-term general hospital      | Yes                                     | No                               | Excluded              |
| AHRF_MDCR_FFS_STD_COST                 | Total standardized Medicare costs, fee for service                    | Yes                                     | No                               | Excluded              |
| AHRF_N_STGH_EXP_1000                   | Total expenses (in \$1000s) from facilities reporting expenses        | Yes                                     | No                               | Excluded              |
| CHR_MENTAL_DR_RATE                     | Number of mental health care providers per 100,000 population         | Yes                                     | No                               | Excluded              |
| CHR_MENTAL_DR_NUM                      | Number of mental health care providers (numerator)                    | Yes                                     | No                               | Excluded              |
| AHRF_TOT_HOSPS                         | Total number of hospitals                                             | Yes                                     | No                               | Excluded              |
| AHRF_COMM_HLTH_CNTR                    | Number of community health centers, grantees only                     | Yes                                     | No                               | Excluded              |
| AHRF_FED_HLTH_CNT                      | Number of Federally Qualified Health Centers                          | No                                      | No                               | Included              |
| AHRF_RURL_REFRRL_CNT                   | Total number of rural referral centers                                | Yes                                     | No                               | Excluded              |
| AHRF_RURAL_H_CLINIC                    | Number of rural health clinics                                        | No                                      | No                               | Included              |
| AHRF_CARDIOVAS_DIS                     | Total number of cardiovascular disease specialists                    | Yes                                     | No                               | Excluded              |
| AHRF_MED_SPEC                          | Total number of medical specialists                                   | Yes                                     | No                               | Excluded              |
| AHRF_ER_MED                            | Total number of non-federal emergency medicine physicians             | Yes                                     | No                               | Excluded              |
| AHRF_GEN_INTERNAL_MED                  | Total number of non-federal general internal medicine physicians      | Yes                                     | No                               | Excluded              |
| AHRF_PHYS_PRIMARY                      | Total number of non-federal primary care physicians                   | Yes                                     | No                               | Excluded              |
| AHRF_TOTAL_MDS                         | Total number of non-federal MDs                                       | Yes                                     | No                               | Excluded              |
| CHR_PRIMARY_DR_RATE                    | Number of primary care physicians per 100,000 population              | Yes                                     | No                               | Excluded              |
| CHR_PRIMARY_DR_NUM                     | Number of primary care physicians (numerator)                         | Yes                                     | No                               | Excluded              |
| <b>Physical Infrastructure Context</b> |                                                                       |                                         |                                  |                       |
| ACS_TOTAL_HOUSEHOLD                    | Total number of households                                            | No                                      | No                               | Included              |
| ACS_PCT_RENTED_HH                      | Percentage of occupied housing units: rented                          | No                                      | No                               | Included              |
| ACS_PCT_10UNITS                        | Percentage of housing in structures with 10 or more units             | Yes                                     | No                               | Excluded              |
| ACS_PCT_HH_PUB_ASSIST                  | Percentage of households with public assistance income or food        | Yes                                     | No                               | Excluded              |
| ACS_PCT_MOBILE_HOME                    | Percentage of housing units that are mobile homes                     | No                                      | No                               | Included              |
| ACS_PCT_PUBL_TRANSIT                   | Percentage of workers taking public transportation, excluding taxicab | Yes                                     | No                               | Excluded              |
| CHR_HOMICIDES                          | Deaths due to homicide per 100,000 population                         | Yes                                     | No                               | Excluded              |

| Variable Label               | Variable description                                                    | Two Criteria for Exclusion              |                                  | Excluded or Included? |
|------------------------------|-------------------------------------------------------------------------|-----------------------------------------|----------------------------------|-----------------------|
|                              |                                                                         | Problem with 10-year Data Availability? | Problem with Multi-Collinearity? |                       |
| CHR_FIREARM_DEATH            | Deaths due to firearms per 100,000 population                           | Yes                                     | No                               | Excluded              |
| CHR_VIOLENT_CRIME            | Reported violent crime offenses per 100,000 population                  | Yes                                     | No                               | Excluded              |
| AHRF_USDA_RUCC_2013          | 2013 Rural-Urban Continuum Code (USDA ERS)                              | No                                      | Yes                              | Excluded              |
| CEN_AREALAND_SQM             | Land areas in square miles                                              | No                                      | Yes                              | Excluded              |
| CEN_POPDENSITY               | Population density                                                      | Yes                                     | Yes                              | Excluded              |
| CCBP_RATE_BWLSTORES_PER_1000 | Beer, wine and liquor stores per 1,000 people                           | No                                      | Yes                              | Excluded              |
| CCBP_RATE_SOGS_PER_1000      | Supermarkets and other grocery (except convenience) stores per 1,000    | No                                      | Yes                              | Excluded              |
| CCBP_RATE_FF_PER_1000        | Limited service restaurants (fast food establishments) per 1,000 people | No                                      | Yes                              | Excluded              |
| CCBP_RATE_FSR_PER_1000       | Full service restaurants per 1,000 people                               | No                                      | Yes                              | Excluded              |
| CCBP_RATE_CS_PER_1000        | Convenience stores per 1,000 people                                     | No                                      | Yes                              | Excluded              |
| CCBP_RATE_SFS_PER_1000       | Specialized food stores per 1,000 people                                | No                                      | Yes                              | Excluded              |
| CCBP_RATE_CFS_PER_1000       | Community food services (targeting low-income or elderly) per 1,000     | No                                      | Yes                              | Excluded              |
| CCBP_RATE_FCRSC_PER_1000     | Fitness centers and recreational sports centers per 1,000 people        | No                                      | Yes                              | Excluded              |
| CCBP_RATE_GAMBLING_PER_1000  | Gambling establishments per 1,000 people                                | No                                      | Yes                              | Excluded              |
| CCBP_RATE_CHS_PER_1000       | Community housing services (targeting low-income or elderly) per        | No                                      | Yes                              | Excluded              |
| CCBP_RATE_CFHEORS_PER_1000   | Emergency and other relief services for victims of domestic or          | No                                      | Yes                              | Excluded              |
| CCBP_RATE_SHELTERS_PER_1000  | Temporary shelters per 1,000 people                                     | No                                      | Yes                              | Excluded              |
| AHRF_PCT_GOOD_AQ             | Percentage of days with good air quality                                | Yes                                     | No                               | Excluded              |
| NEPHTN_MODAAC_PM25           | Annual average ambient concentrations of PM2.5 in                       | Yes                                     | No                               | Excluded              |
| NEPHTN_HEATIND_100           | Extreme heat - 100°F: Number of days with daily maximum heat index,     | Yes                                     | No                               | Excluded              |
| NEPHTN_HEATIND_105           | Extreme heat - 105°F: Number of days with daily maximum heat index,     | Yes                                     | No                               | Excluded              |
| NEPHTN_HEATIND_90            | Extreme heat - 90°F: Number of days with daily maximum index, absolute  | Yes                                     | No                               | Excluded              |
| NEPHTN_HEATIND_95            | Extreme heat - 95°F: Number of days with daily maximum heat index,      | Yes                                     | No                               | Excluded              |
| NEPHTN_LEAD                  | Percentage of children tested with confirmed blood lead levels 10 µg/dL | Yes                                     | No                               | Excluded              |
| NEPHTN_NUMDROUGHT            | Number of months of mild drought or worse per year                      | Yes                                     | No                               | Excluded              |
| NEPHTN_TEMPERATURE_100       | Extreme heat - 100°F: Number of days with daily maximum temperature,    | Yes                                     | No                               | Excluded              |
| NEPHTN_TEMPERATURE_105       | Extreme heat - 105°F: Number of days with daily maximum temperature,    | Yes                                     | No                               | Excluded              |

|                       |                                                                     |     |    |          |
|-----------------------|---------------------------------------------------------------------|-----|----|----------|
| NEPHTN_TEMPERATURE_90 | Extreme heat - 90°F: Number of days with daily maximum temperature, | Yes | No | Excluded |
| NEPHTN_TEMPERATURE_95 | Extreme heat - 95°F: Number of days with daily maximum temperature, | Yes | No | Excluded |
